# Supplementary material for: Polymeric copper(i)–NHC complexes with bulky bidentate (N^C) ligands: synthesis and solid-state luminescence
Source: Royal Society of Chemistry journal article supplement (doi:10.1039/d3dt01669b), 2023-01-01
Supplement: d3dt01669b1.pdf [file d3dt01669b1.pdf]

## Polymeric copper(I)–NHC complexes with bulky bidentate (N<sup>^</sup>C) ligands: synthesis and solid-state luminescence

### ELECTRONIC SUPPLEMENTARY INFORMATION

Arruri Sathyanarayana<sup>1</sup>, François Réveret<sup>1</sup>, Laurent Jouffret<sup>1</sup>, Damien Boyer<sup>1</sup>, Geneviève Chadeyron<sup>1</sup>,  
Federico Cisnetti<sup>1\*</sup>

<sup>1</sup>*Université Clermont Auvergne, CNRS, Clermont Auvergne INP, ICCF, F-63000 Clermont–Ferrand,  
France.*

Corresponding author: [federico.cisnetti@uca.fr](mailto:federico.cisnetti@uca.fr)

#### Contents

|                                                           |     |
|-----------------------------------------------------------|-----|
| • NMR spectra for all compounds                           | S2  |
| • Crystallography tables                                  | S10 |
| • PXRD data                                               | S17 |
| • CIE coordinates                                         | S20 |
| • PLQY measurements                                       | S21 |
| • Emission spectra before and after thermal treatment     | S27 |
| • Emission spectra and luminescence lifetime measurements | S28 |

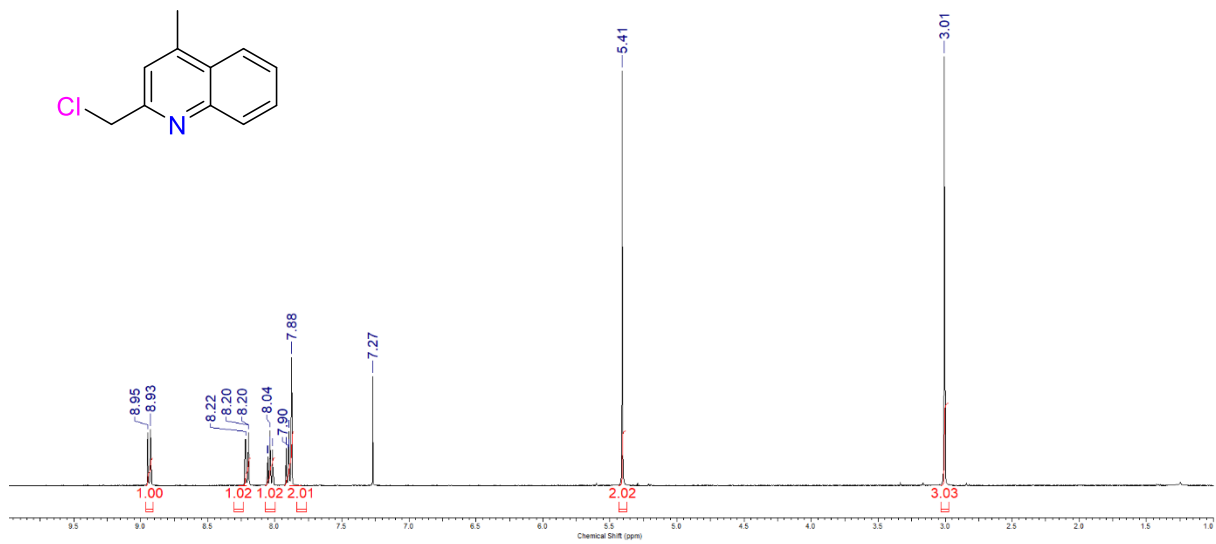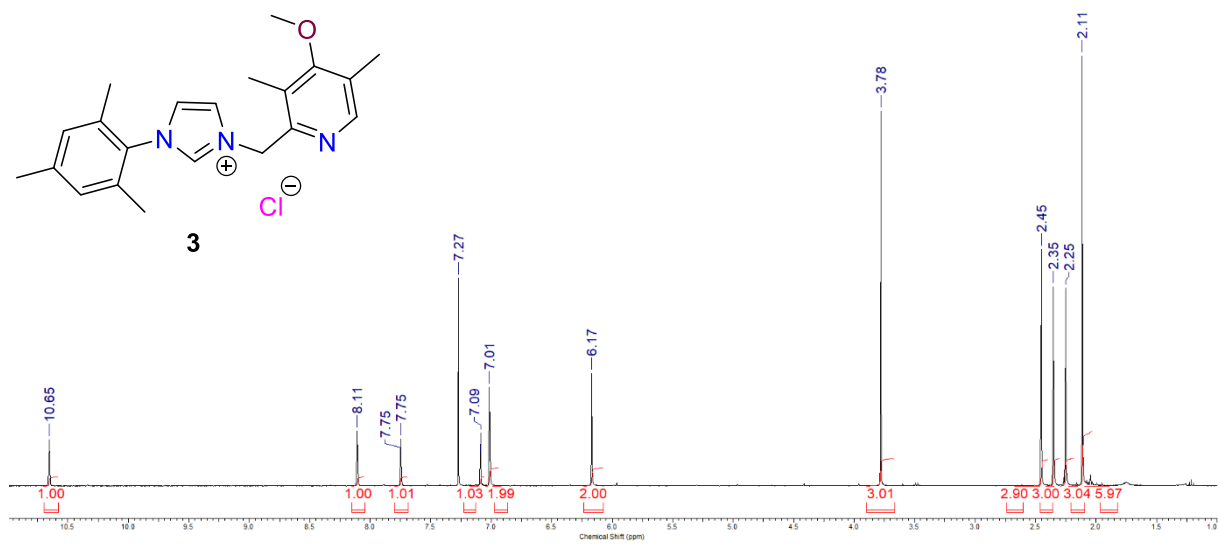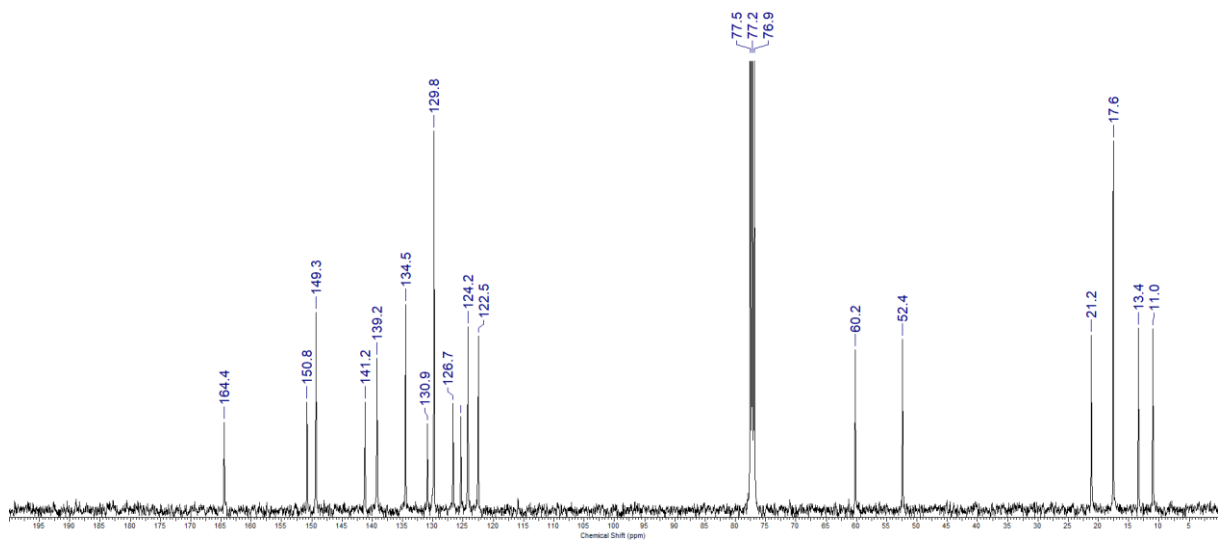

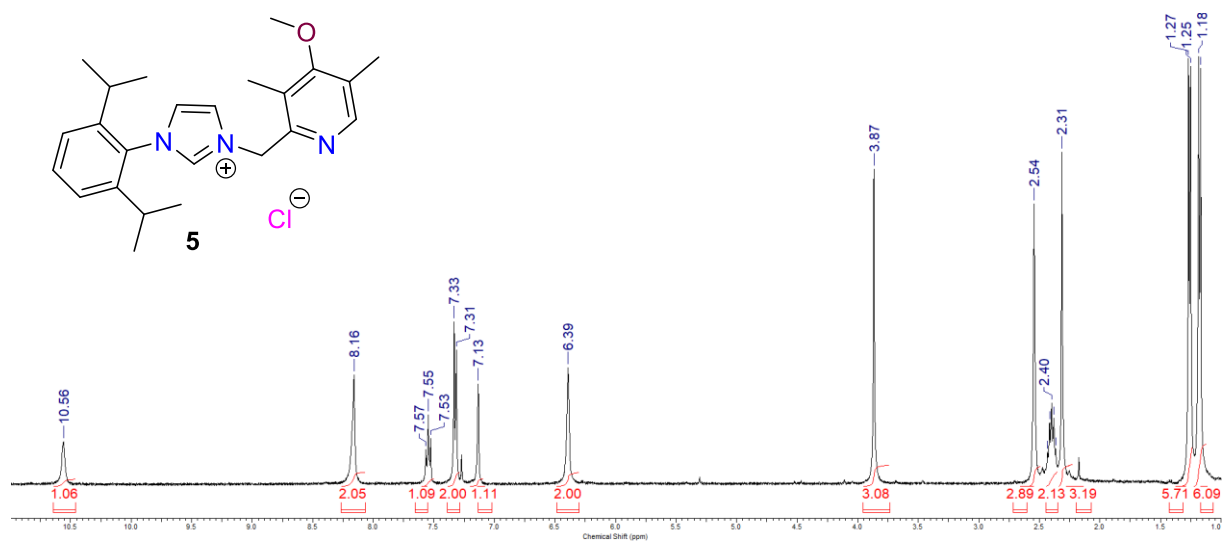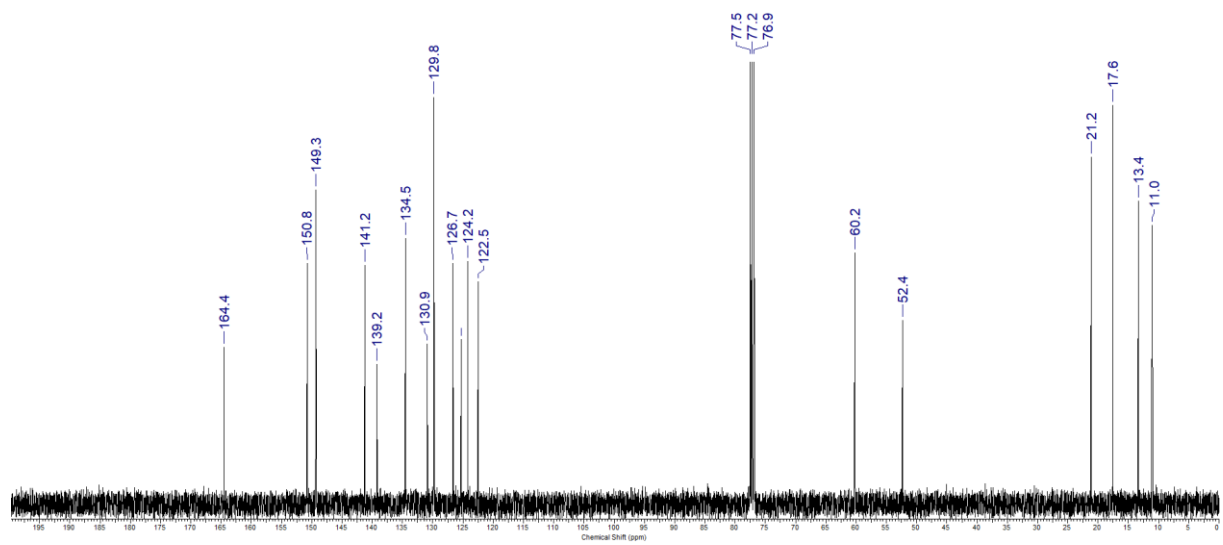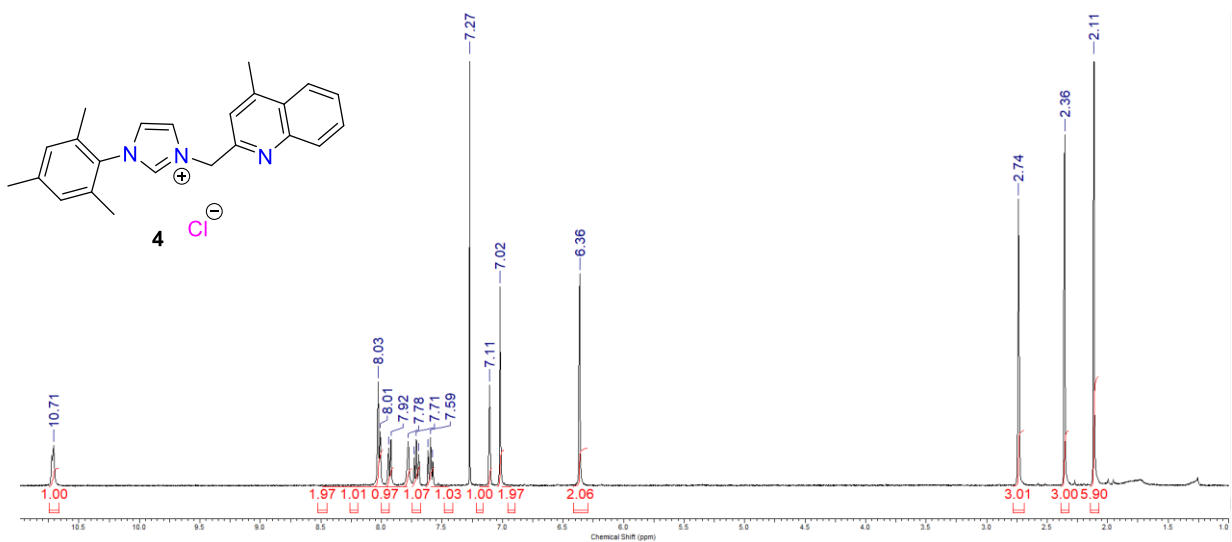

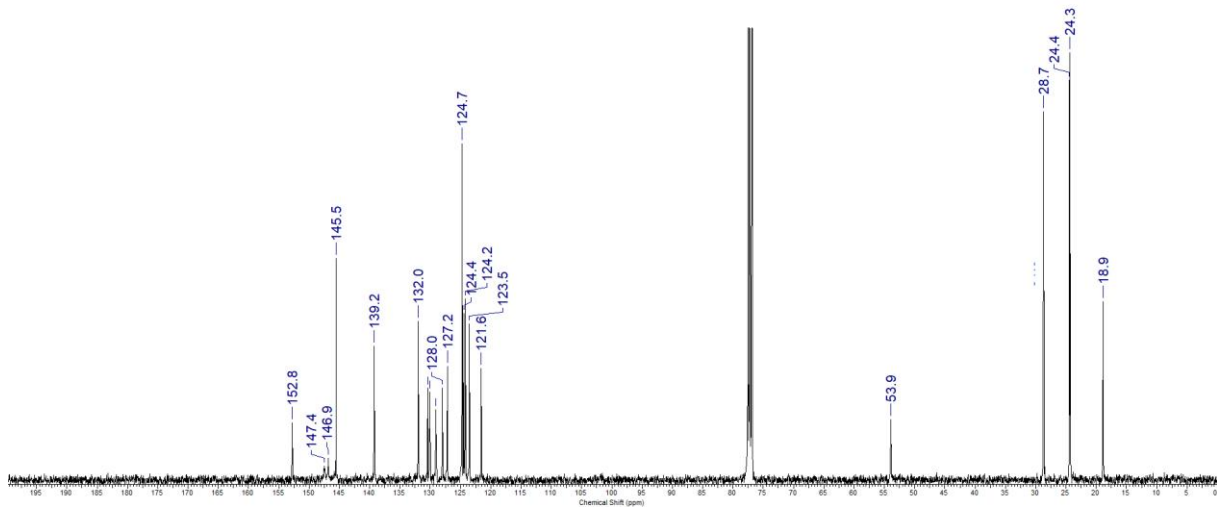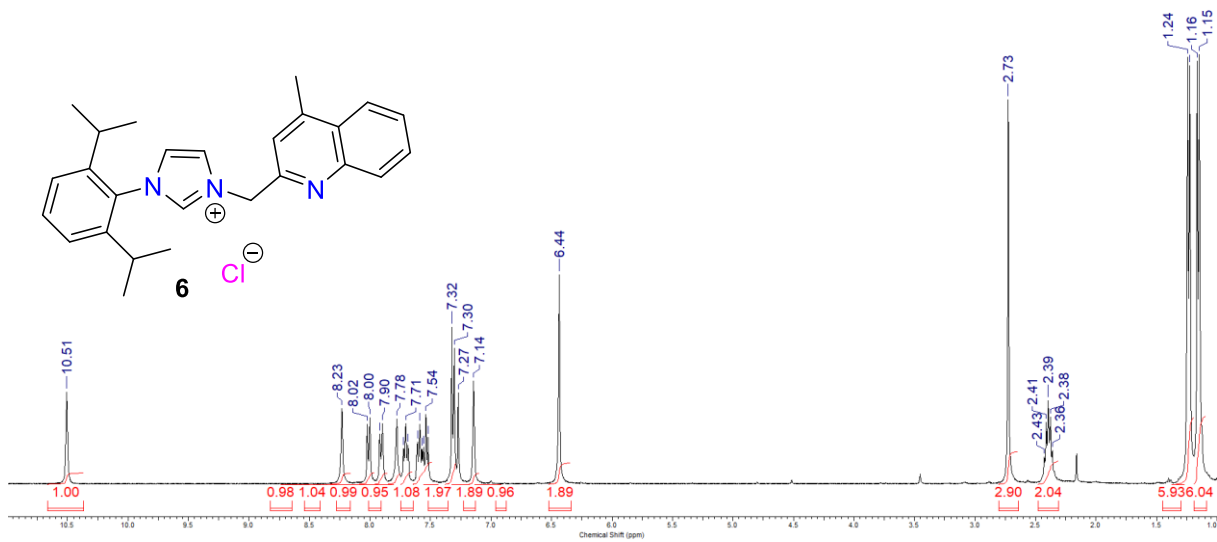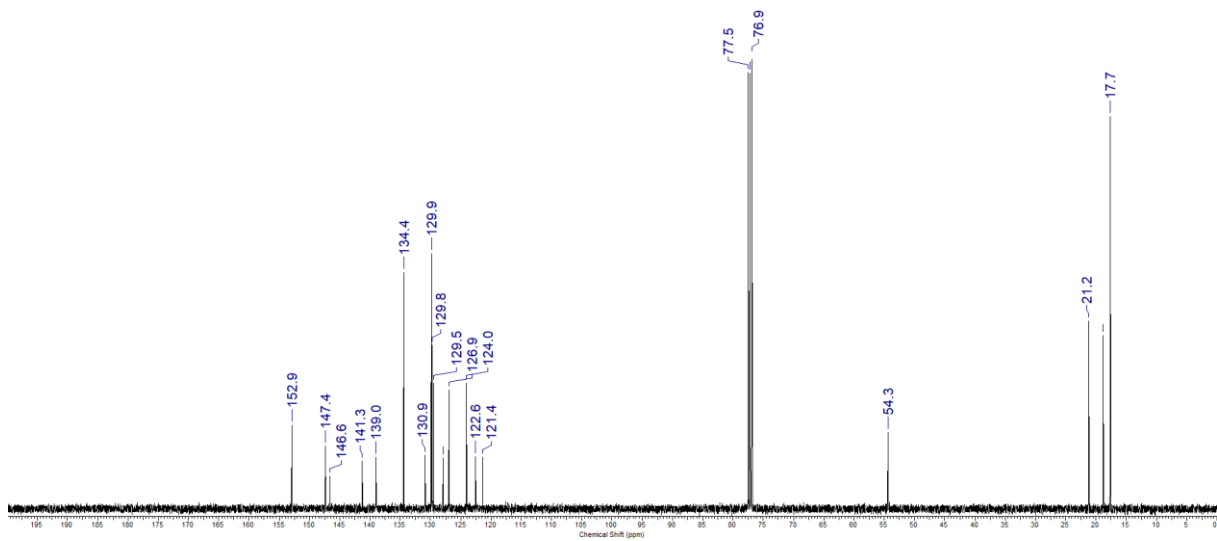

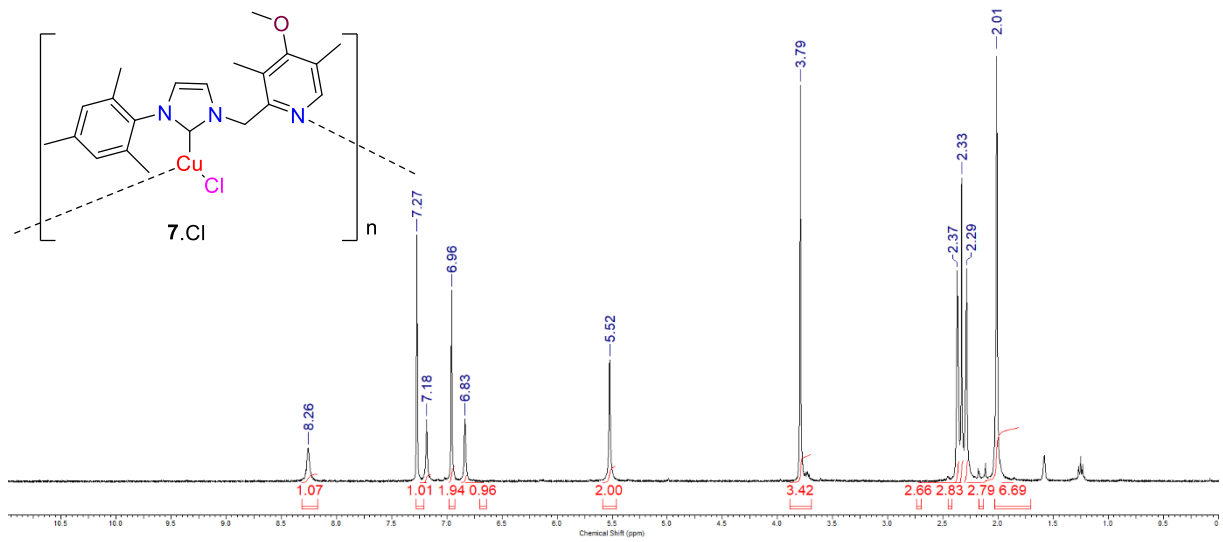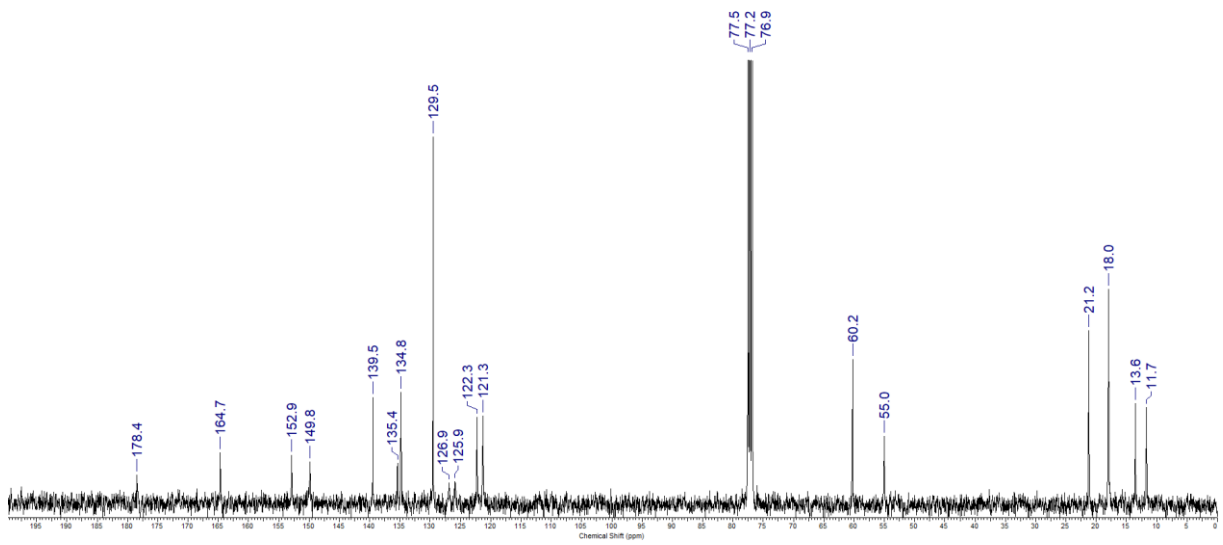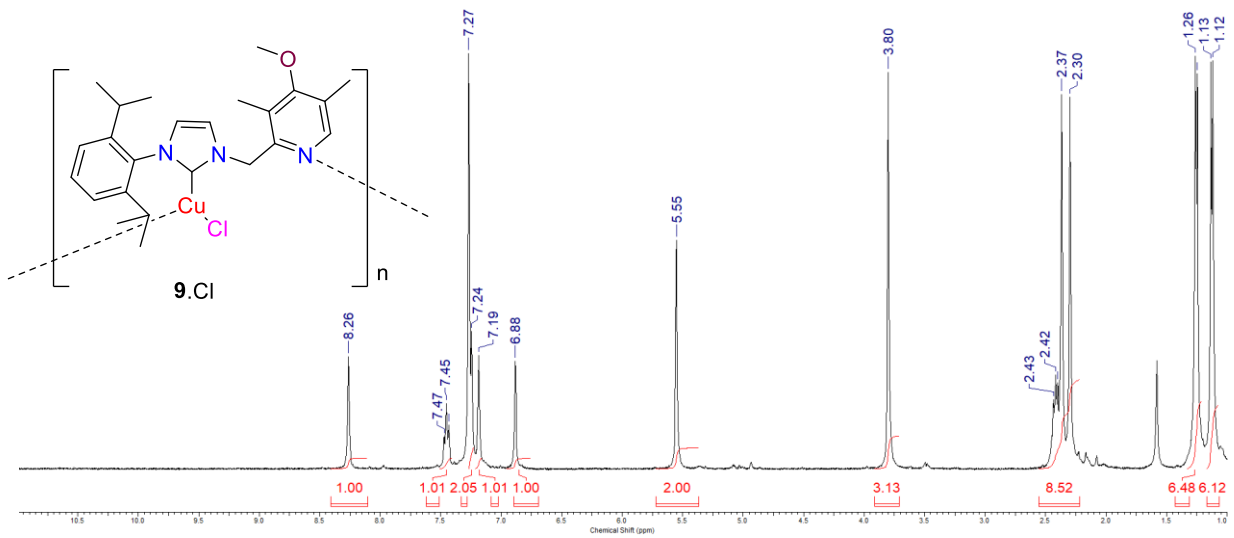

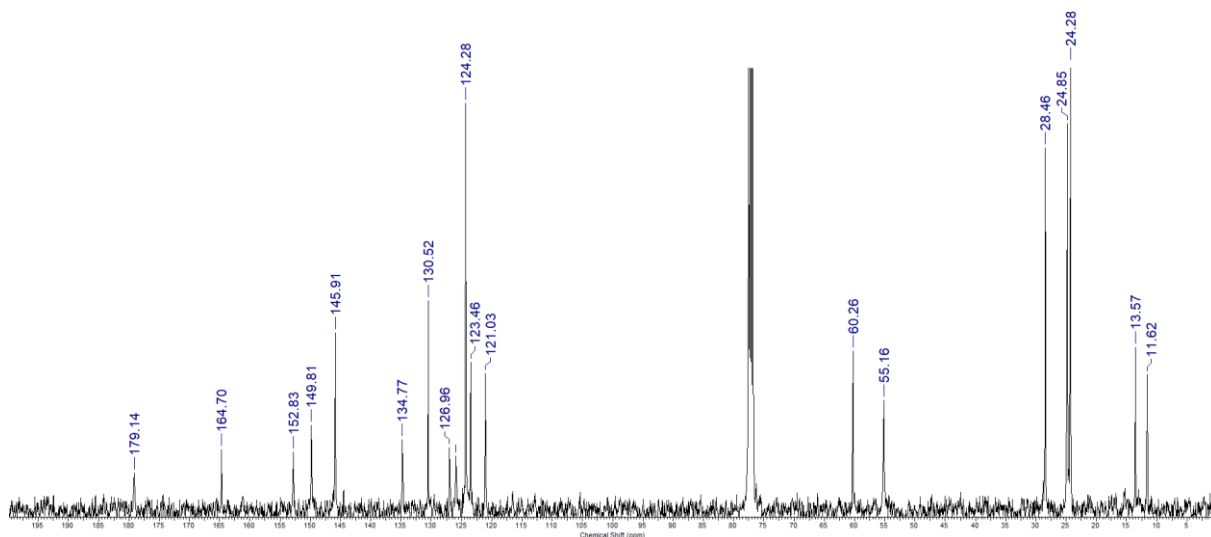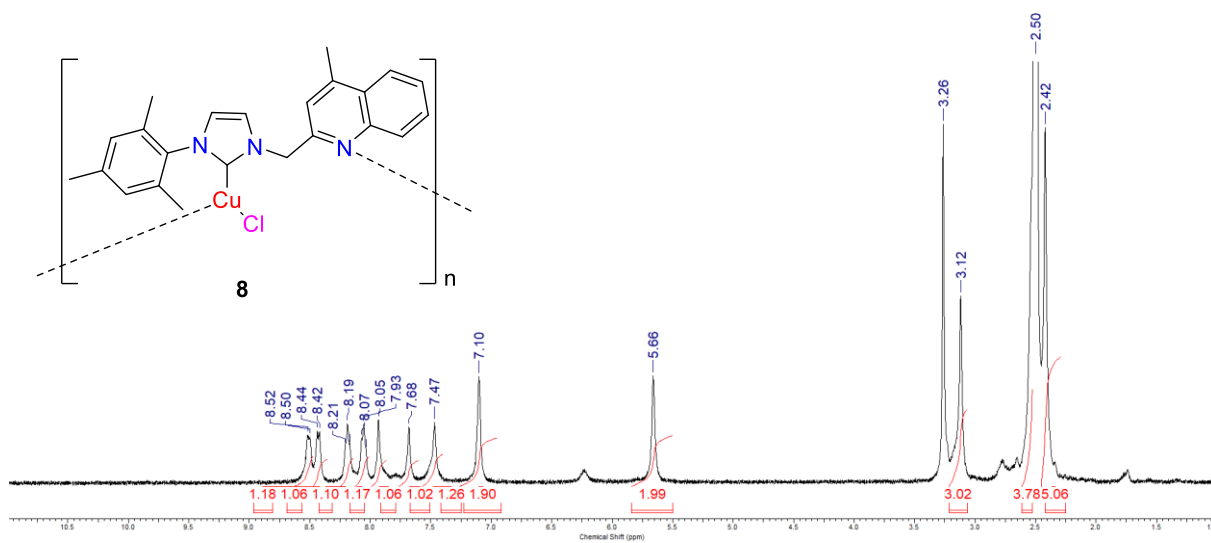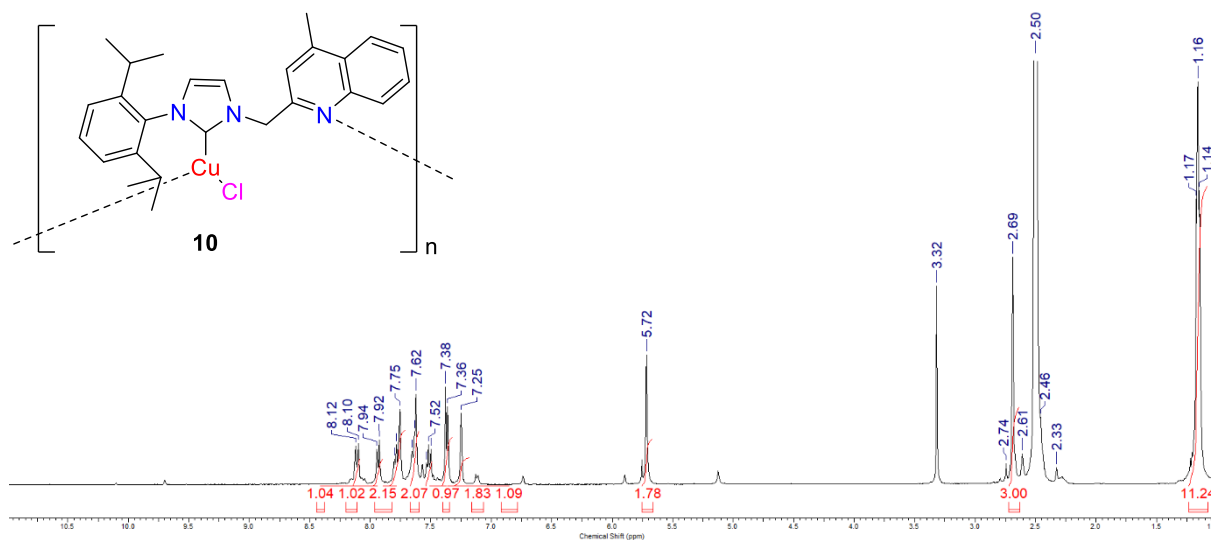

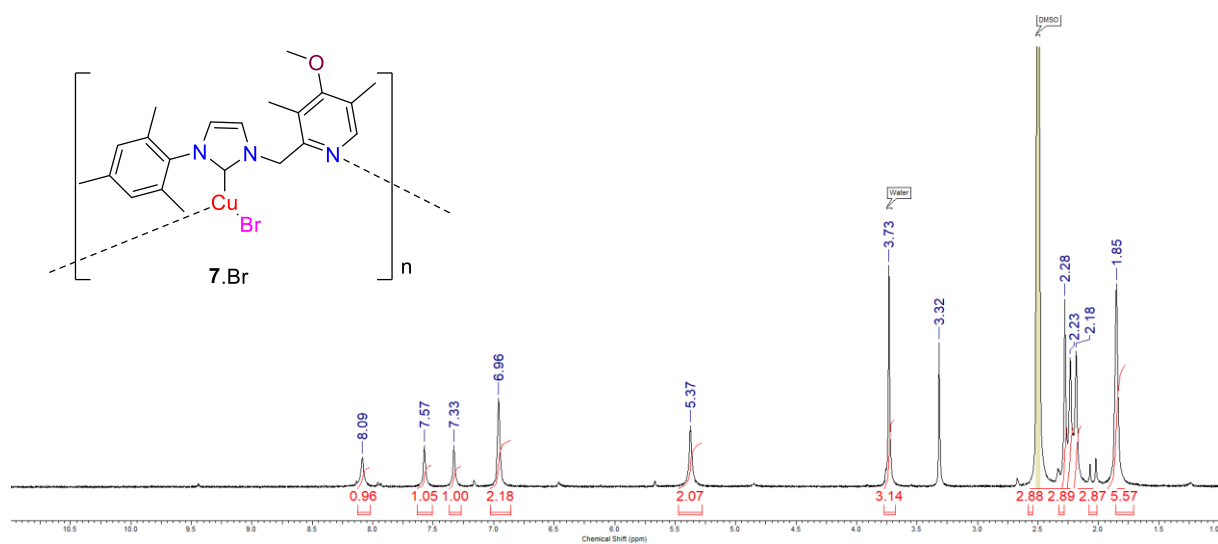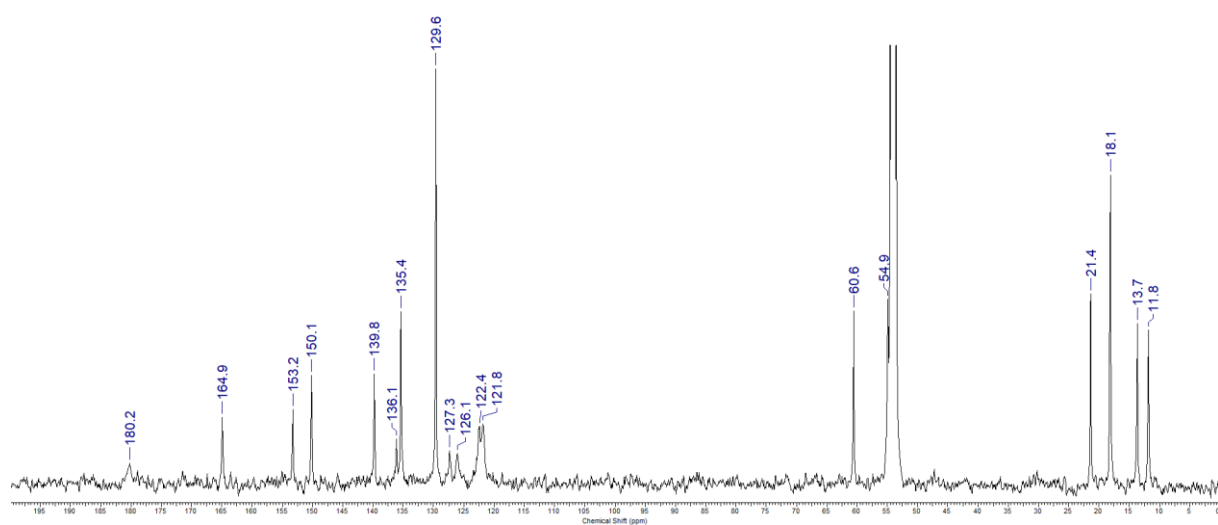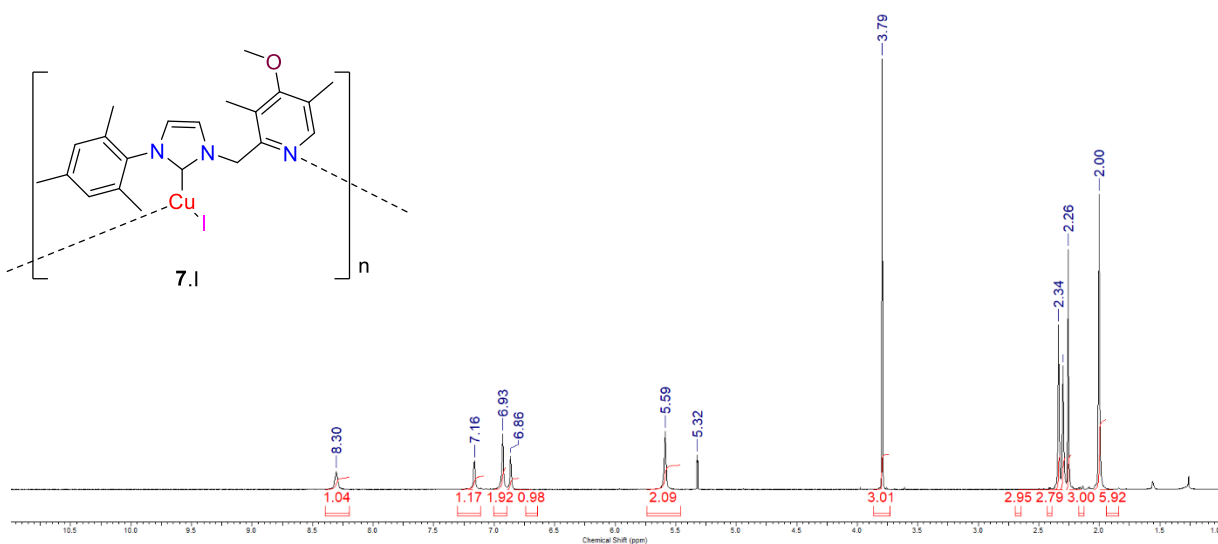

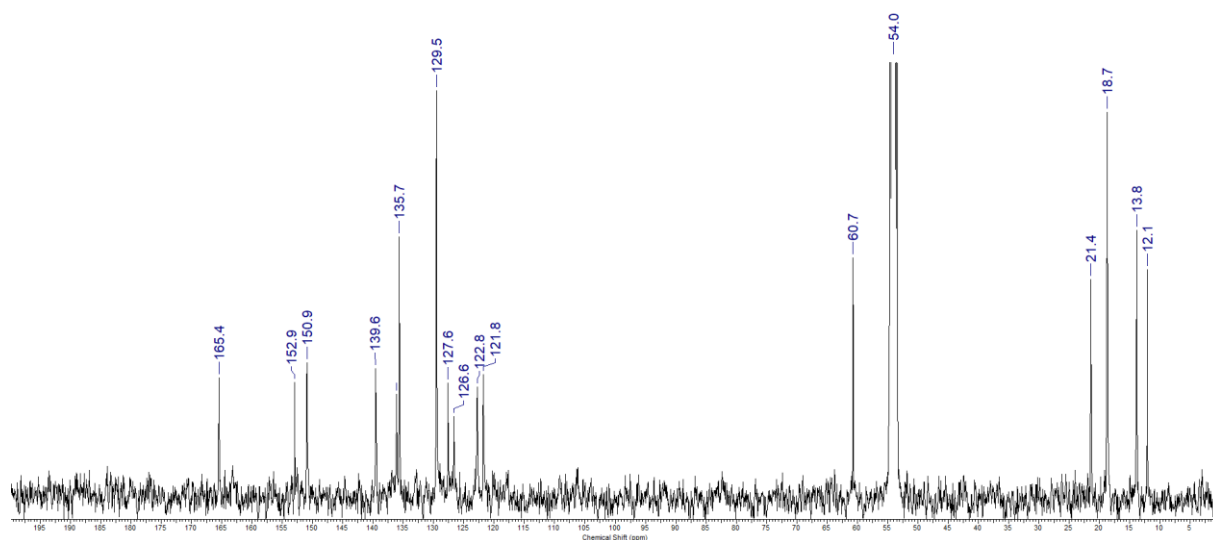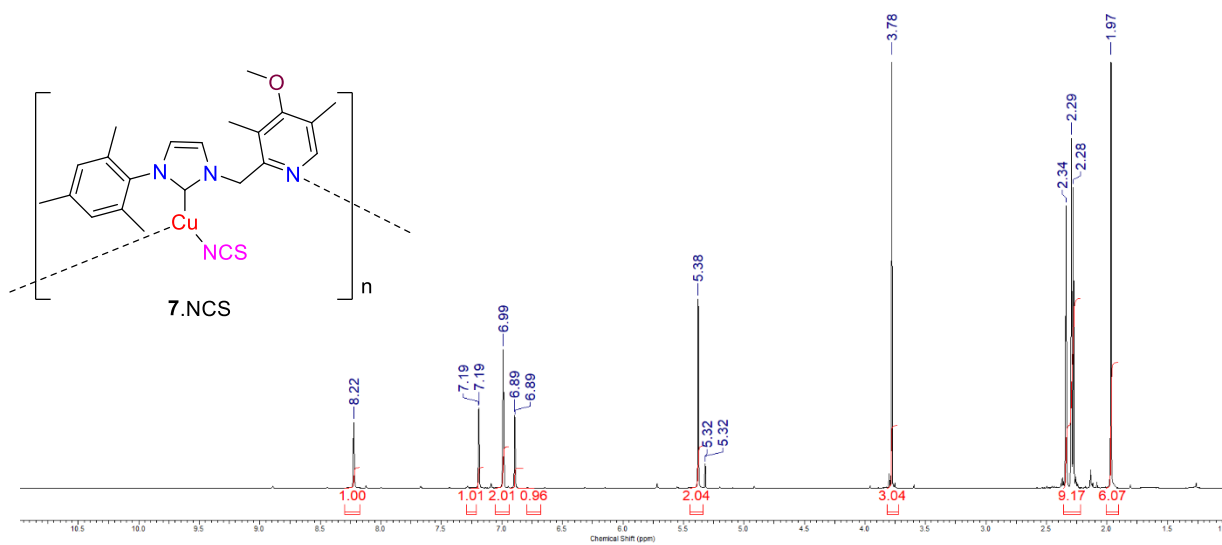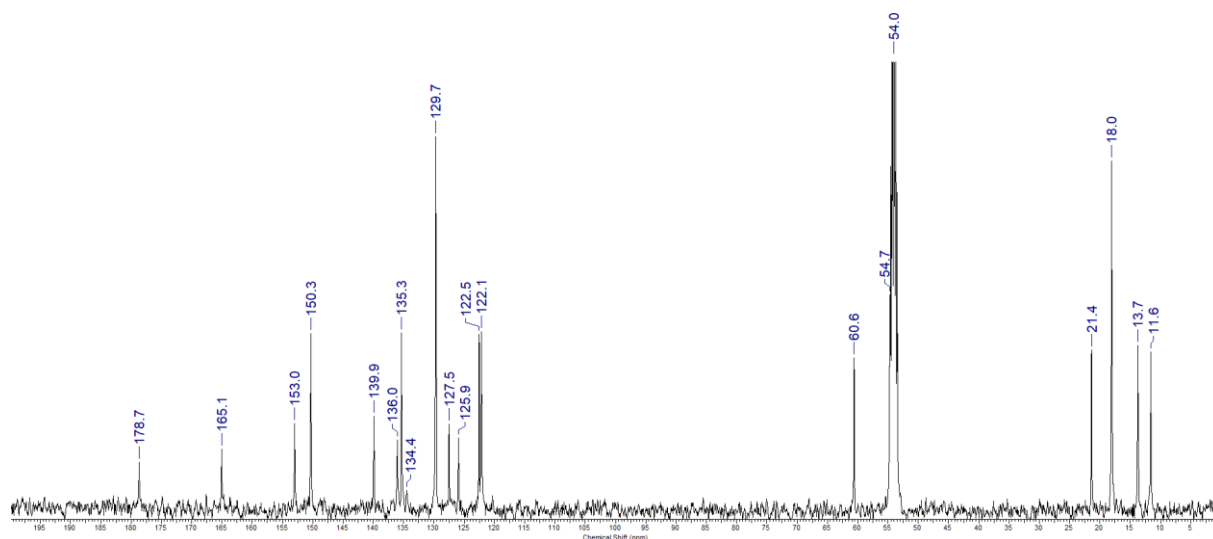



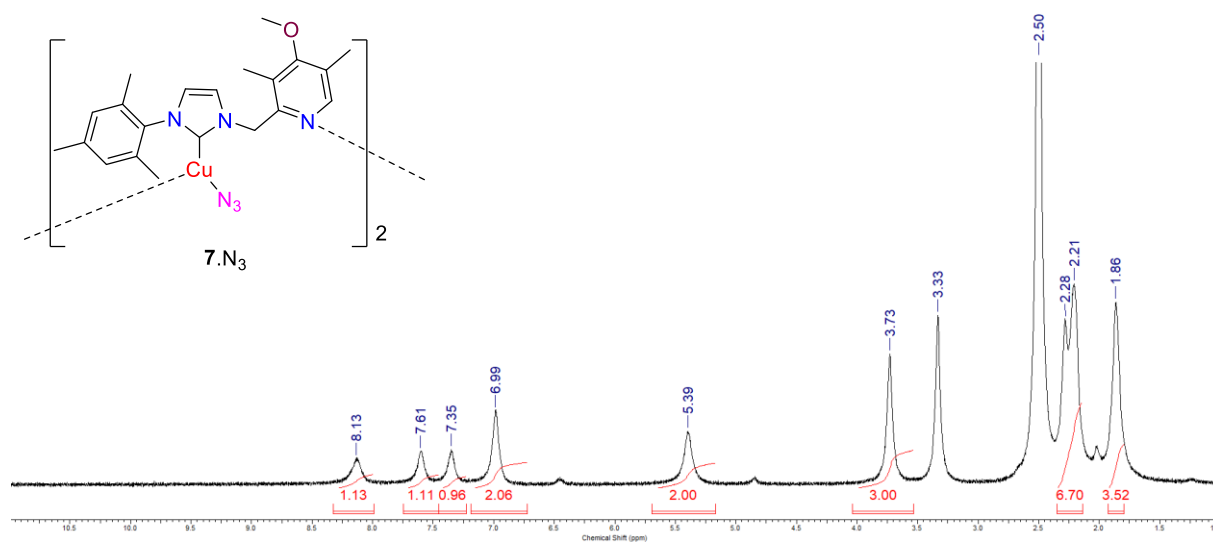

**Fig. S1**  $^1\text{H}$ - and  $^{13}\text{C}$ -NMR spectra of all compounds

**Table S1. Sample and crystal refinement data for 7.Cl**

|                                            |                                                                                                                                                                                                                                                                                     |
|--------------------------------------------|-------------------------------------------------------------------------------------------------------------------------------------------------------------------------------------------------------------------------------------------------------------------------------------|
| <b>Chemical formula</b>                    | C <sub>21</sub> H <sub>25</sub> ClCuN <sub>3</sub> O                                                                                                                                                                                                                                |
| <b>Formula weight</b>                      | 434.43 g/mol                                                                                                                                                                                                                                                                        |
| <b>Temperature</b>                         | 100(2) K                                                                                                                                                                                                                                                                            |
| <b>Wavelength</b>                          | 0.71073 Å                                                                                                                                                                                                                                                                           |
| <b>Crystal size</b>                        | 0.110 x 0.239 x 0.504 mm                                                                                                                                                                                                                                                            |
| <b>Crystal system</b>                      | monoclinic                                                                                                                                                                                                                                                                          |
| <b>Space group</b>                         | P 1 21/n 1                                                                                                                                                                                                                                                                          |
| <b>Unit cell dimensions</b>                | a = 14.3299(15) Å    α = 90°<br>b = 9.6126(10) Å    β = 90.387(4)°<br>c = 14.9035(16) Å    γ = 90°                                                                                                                                                                                  |
| <b>Volume</b>                              | 2052.9(4) Å <sup>3</sup>                                                                                                                                                                                                                                                            |
| <b>Z</b>                                   | 4                                                                                                                                                                                                                                                                                   |
| <b>Density (calculated)</b>                | 1.406 g/cm <sup>3</sup>                                                                                                                                                                                                                                                             |
| <b>Absorption coefficient</b>              | 1.209 mm <sup>-1</sup>                                                                                                                                                                                                                                                              |
| <b>F(000)</b>                              | 904                                                                                                                                                                                                                                                                                 |
| <b>Theta range for data collection</b>     | 1.97 to 30.51°                                                                                                                                                                                                                                                                      |
| <b>Index ranges</b>                        | -20 ≤ h ≤ 20, -13 ≤ k ≤ 13, -21 ≤ l ≤ 21                                                                                                                                                                                                                                            |
| <b>Reflections collected</b>               | 168008                                                                                                                                                                                                                                                                              |
| <b>Independent reflections</b>             | 6281 [R(int) = 0.0900]                                                                                                                                                                                                                                                              |
| <b>Coverage of independent reflections</b> | 100.0%                                                                                                                                                                                                                                                                              |
| <b>Absorption correction</b>               | Numerical                                                                                                                                                                                                                                                                           |
| <b>Max. and min. transmission</b>          | 0.8780 and 0.5810                                                                                                                                                                                                                                                                   |
| <b>Structure solution technique</b>        | direct methods                                                                                                                                                                                                                                                                      |
| <b>Structure solution program</b>          | SHELXT 2018/2 (Sheldrick, 2018)                                                                                                                                                                                                                                                     |
| <b>Refinement method</b>                   | Full-matrix least-squares on F <sup>2</sup>                                                                                                                                                                                                                                         |
| <b>Refinement program</b>                  | SHELXL-2018/3 (Sheldrick, 2018)                                                                                                                                                                                                                                                     |
| <b>Function minimized</b>                  | Σ w(F <sub>o</sub> <sup>2</sup> - F <sub>c</sub> <sup>2</sup> ) <sup>2</sup>                                                                                                                                                                                                        |
| <b>Data / restraints / parameters</b>      | 6281 / 0 / 250                                                                                                                                                                                                                                                                      |
| <b>Goodness-of-fit on F<sup>2</sup></b>    | 1.030                                                                                                                                                                                                                                                                               |
| <b>Δ/σ<sub>max</sub></b>                   | 0.001                                                                                                                                                                                                                                                                               |
| <b>Final R indices</b>                     | 5179 data; I > 2σ(I)    R1 = 0.0311, wR2 = 0.0722<br>all data                    R1 = 0.0449, wR2 = 0.0795<br>w = 1/[σ <sup>2</sup> (F <sub>o</sub> <sup>2</sup> ) + (0.0286P) <sup>2</sup> + 2.2658P]<br>where P = (F <sub>o</sub> <sup>2</sup> + 2F <sub>c</sub> <sup>2</sup> )/3 |
| <b>Weighting scheme</b>                    |                                                                                                                                                                                                                                                                                     |
| <b>Largest diff. peak and hole</b>         | 0.508 and -0.469 eÅ <sup>-3</sup>                                                                                                                                                                                                                                                   |
| <b>R.M.S. deviation from mean</b>          | 0.075 eÅ <sup>-3</sup>                                                                                                                                                                                                                                                              |

**Table S2. Sample and crystal refinement data for 8**

|                                            |                                                                                                                                                                       |
|--------------------------------------------|-----------------------------------------------------------------------------------------------------------------------------------------------------------------------|
| <b>Chemical formula</b>                    | C <sub>24</sub> H <sub>25</sub> Cl <sub>3</sub> CuN <sub>3</sub>                                                                                                      |
| <b>Formula weight</b>                      | 525.36 g/mol                                                                                                                                                          |
| <b>Temperature</b>                         | 173(2) K                                                                                                                                                              |
| <b>Wavelength</b>                          | 0.71073 Å                                                                                                                                                             |
| <b>Crystal size</b>                        | 0.196 x 0.245 x 0.390 mm                                                                                                                                              |
| <b>Crystal system</b>                      | monoclinic                                                                                                                                                            |
| <b>Space group</b>                         | P 1 2 <sub>1</sub> /n 1                                                                                                                                               |
| <b>Unit cell dimensions</b>                | a = 13.8969(14) Å    α = 90°<br>b = 10.5381(11) Å    β = 108.907(3)°<br>c = 17.6009(17) Å    γ = 90°                                                                  |
| <b>Volume</b>                              | 2438.5(4) Å <sup>3</sup>                                                                                                                                              |
| <b>Z</b>                                   | 4                                                                                                                                                                     |
| <b>Density (calculated)</b>                | 1.431 g/cm <sup>3</sup>                                                                                                                                               |
| <b>Absorption coefficient</b>              | 1.241 mm <sup>-1</sup>                                                                                                                                                |
| <b>F(000)</b>                              | 1080                                                                                                                                                                  |
| <b>Theta range for data collection</b>     | 2.26 to 32.83°                                                                                                                                                        |
| <b>Index ranges</b>                        | -21 ≤ h ≤ 21, -15 ≤ k ≤ 15, -26 ≤ l ≤ 26                                                                                                                              |
| <b>Reflections collected</b>               | 99517                                                                                                                                                                 |
| <b>Independent reflections</b>             | 8772 [R(int) = 0.0524]                                                                                                                                                |
| <b>Coverage of independent reflections</b> | 96.7%                                                                                                                                                                 |
| <b>Absorption correction</b>               | Numerical                                                                                                                                                             |
| <b>Max. and min. transmission</b>          | 0.7930 and 0.6430                                                                                                                                                     |
| <b>Structure solution technique</b>        | direct methods                                                                                                                                                        |
| <b>Structure solution program</b>          | SHELXT 2018/2 (Sheldrick, 2018)                                                                                                                                       |
| <b>Refinement method</b>                   | Full-matrix least-squares on F <sup>2</sup>                                                                                                                           |
| <b>Refinement program</b>                  | SHELXL-2018/3 (Sheldrick, 2018)                                                                                                                                       |
| <b>Function minimized</b>                  | Σ w(F <sub>o</sub> <sup>2</sup> - F <sub>c</sub> <sup>2</sup> ) <sup>2</sup>                                                                                          |
| <b>Data / restraints / parameters</b>      | 8772 / 0 / 380                                                                                                                                                        |
| <b>Goodness-of-fit on F<sup>2</sup></b>    | 1.027                                                                                                                                                                 |
| <b>Δ/σ<sub>max</sub></b>                   | 0.001                                                                                                                                                                 |
| <b>Final R indices</b>                     | 7009 data; I > 2σ(I)    R1 = 0.0324, wR2 = 0.0799<br>all data                    R1 = 0.0465, wR2 = 0.0867                                                            |
| <b>Weighting scheme</b>                    | w = 1/[σ <sup>2</sup> (F <sub>o</sub> <sup>2</sup> ) + (0.0402P) <sup>2</sup> + 1.0651P]<br>where P = (F <sub>o</sub> <sup>2</sup> + 2F <sub>c</sub> <sup>2</sup> )/3 |
| <b>Largest diff. peak and hole</b>         | 0.711 and -0.699 eÅ <sup>-3</sup>                                                                                                                                     |
| <b>R.M.S. deviation from mean</b>          | 0.068 eÅ <sup>-3</sup>                                                                                                                                                |

**Table S3. Sample and crystal refinement data for 9**

|                                            |                                                                                                                                                                       |                           |
|--------------------------------------------|-----------------------------------------------------------------------------------------------------------------------------------------------------------------------|---------------------------|
| <b>Chemical formula</b>                    | C <sub>24</sub> H <sub>31</sub> ClCuN <sub>3</sub> O                                                                                                                  |                           |
| <b>Formula weight</b>                      | 476.51 g/mol                                                                                                                                                          |                           |
| <b>Temperature</b>                         | 103(2) K                                                                                                                                                              |                           |
| <b>Wavelength</b>                          | 0.71073 Å                                                                                                                                                             |                           |
| <b>Crystal size</b>                        | 0.230 x 0.262 x 0.266 mm                                                                                                                                              |                           |
| <b>Crystal system</b>                      | monoclinic                                                                                                                                                            |                           |
| <b>Space group</b>                         | P 1 21/n 1                                                                                                                                                            |                           |
| <b>Unit cell dimensions</b>                | a = 10.5133(13) Å                                                                                                                                                     | α = 90°                   |
|                                            | b = 12.5355(15) Å                                                                                                                                                     | β = 98.654(4)°            |
|                                            | c = 17.866(2) Å                                                                                                                                                       | γ = 90°                   |
| <b>Volume</b>                              | 2327.7(5) Å <sup>3</sup>                                                                                                                                              |                           |
| <b>Z</b>                                   | 4                                                                                                                                                                     |                           |
| <b>Density (calculated)</b>                | 1.360 g/cm <sup>3</sup>                                                                                                                                               |                           |
| <b>Absorption coefficient</b>              | 1.073 mm <sup>-1</sup>                                                                                                                                                |                           |
| <b>F(000)</b>                              | 1000                                                                                                                                                                  |                           |
| <b>Theta range for data collection</b>     | 2.42 to 27.48°                                                                                                                                                        |                           |
| <b>Index ranges</b>                        | -13 ≤ h ≤ 13, -16 ≤ k ≤ 16, -23 ≤ l ≤ 23                                                                                                                              |                           |
| <b>Reflections collected</b>               | 82654                                                                                                                                                                 |                           |
| <b>Independent reflections</b>             | 5337 [R(int) = 0.0387]                                                                                                                                                |                           |
| <b>Coverage of independent reflections</b> | 99.9%                                                                                                                                                                 |                           |
| <b>Absorption correction</b>               | Numerical                                                                                                                                                             |                           |
| <b>Max. and min. transmission</b>          | 0.7900 and 0.7630                                                                                                                                                     |                           |
| <b>Structure solution technique</b>        | direct methods                                                                                                                                                        |                           |
| <b>Structure solution program</b>          | SHELXT 2018/2 (Sheldrick, 2018)                                                                                                                                       |                           |
| <b>Refinement method</b>                   | Full-matrix least-squares on F <sup>2</sup>                                                                                                                           |                           |
| <b>Refinement program</b>                  | SHELXL-2018/3 (Sheldrick, 2018)                                                                                                                                       |                           |
| <b>Function minimized</b>                  | Σ w(F <sub>o</sub> <sup>2</sup> - F <sub>c</sub> <sup>2</sup> ) <sup>2</sup>                                                                                          |                           |
| <b>Data / restraints / parameters</b>      | 5337 / 0 / 278                                                                                                                                                        |                           |
| <b>Goodness-of-fit on F<sup>2</sup></b>    | 1.057                                                                                                                                                                 |                           |
| <b>Δ/σ<sub>max</sub></b>                   | 0.001                                                                                                                                                                 |                           |
| <b>Final R indices</b>                     | 4757 data; I > 2σ(I)                                                                                                                                                  | R1 = 0.0354, wR2 = 0.0899 |
|                                            | all data                                                                                                                                                              | R1 = 0.0409, wR2 = 0.0935 |
| <b>Weighting scheme</b>                    | w = 1/[σ <sup>2</sup> (F <sub>o</sub> <sup>2</sup> ) + (0.0432P) <sup>2</sup> + 2.8561P]<br>where P = (F <sub>o</sub> <sup>2</sup> + 2F <sub>c</sub> <sup>2</sup> )/3 |                           |
| <b>Largest diff. peak and hole</b>         | 1.648 and -0.754 eÅ <sup>-3</sup>                                                                                                                                     |                           |
| <b>R.M.S. deviation from mean</b>          | 0.079 eÅ <sup>-3</sup>                                                                                                                                                |                           |

**Table S4. Sample and crystal refinement data for 10**

|                                            |                                                                                                                                                       |
|--------------------------------------------|-------------------------------------------------------------------------------------------------------------------------------------------------------|
| <b>Chemical formula</b>                    | C <sub>26</sub> H <sub>29</sub> ClCuN <sub>3</sub>                                                                                                    |
| <b>Formula weight</b>                      | 482.51 g/mol                                                                                                                                          |
| <b>Temperature</b>                         | 173(2) K                                                                                                                                              |
| <b>Wavelength</b>                          | 0.71073 Å                                                                                                                                             |
| <b>Crystal size</b>                        | 0.098 x 0.142 x 0.198 mm                                                                                                                              |
| <b>Crystal system</b>                      | monoclinic                                                                                                                                            |
| <b>Space group</b>                         | P 2 <sub>1</sub> /c                                                                                                                                   |
| <b>Unit cell dimensions</b>                | a = 13.1798(15) Å    α = 90°<br>b = 14.1584(16) Å    β = 97.399(11)°<br>c = 12.8105(15) Å    γ = 90°                                                  |
| <b>Volume</b>                              | 2370.6(5) Å <sup>3</sup>                                                                                                                              |
| <b>Z</b>                                   | 4                                                                                                                                                     |
| <b>Density (calculated)</b>                | 1.352 g/cm <sup>3</sup>                                                                                                                               |
| <b>Absorption coefficient</b>              | 1.052 mm <sup>-1</sup>                                                                                                                                |
| <b>F(000)</b>                              | 1008                                                                                                                                                  |
| <b>Theta range for data collection</b>     | 2.54 to 33.14°                                                                                                                                        |
| <b>Index ranges</b>                        | -19<=h<=19, -21<=k<=20, -19<=l<=18                                                                                                                    |
| <b>Reflections collected</b>               | 196946                                                                                                                                                |
| <b>Independent reflections</b>             | 8400 [R(int) = 0.3990]                                                                                                                                |
| <b>Coverage of independent reflections</b> | 93.1%                                                                                                                                                 |
| <b>Absorption correction</b>               | Numerical                                                                                                                                             |
| <b>Max. and min. transmission</b>          | 0.9040 and 0.8190                                                                                                                                     |
| <b>Structure solution technique</b>        | direct methods                                                                                                                                        |
| <b>Structure solution program</b>          | SHELXT 2018/2 (Sheldrick, 2018)                                                                                                                       |
| <b>Refinement method</b>                   | Full-matrix least-squares on F <sup>2</sup>                                                                                                           |
| <b>Refinement program</b>                  | SHELXL-2018/3 (Sheldrick, 2018)                                                                                                                       |
| <b>Function minimized</b>                  | Σ w(F <sub>o</sub> <sup>2</sup> - F <sub>c</sub> <sup>2</sup> ) <sup>2</sup>                                                                          |
| <b>Data / restraints / parameters</b>      | 8400 / 0 / 285                                                                                                                                        |
| <b>Goodness-of-fit on F<sup>2</sup></b>    | 0.933                                                                                                                                                 |
| <b>Δ/σ<sub>max</sub></b>                   | 0.001                                                                                                                                                 |
| <b>Final R indices</b>                     | 2889 data; I>2σ(I)    R1 = 0.0742, wR2 = 0.1536<br>all data                    R1 = 0.2849, wR2 = 0.2342                                              |
| <b>Weighting scheme</b>                    | w=1/[σ <sup>2</sup> (F <sub>o</sub> <sup>2</sup> )+(0.1050P) <sup>2</sup> ]<br>where P=(F <sub>o</sub> <sup>2</sup> +2F <sub>c</sub> <sup>2</sup> )/3 |
| <b>Absolute structure parameter</b>        | 0.00(4)                                                                                                                                               |
| <b>Largest diff. peak and hole</b>         | 0.427 and -0.612 eÅ <sup>-3</sup>                                                                                                                     |
| <b>R.M.S. deviation from mean</b>          | 0.098 eÅ <sup>-3</sup>                                                                                                                                |

**Table S5. Sample and crystal refinement data for 7.Br**

|                                            |                                                                                                                                                                       |
|--------------------------------------------|-----------------------------------------------------------------------------------------------------------------------------------------------------------------------|
| <b>Chemical formula</b>                    | C <sub>21</sub> H <sub>25</sub> BrCuN <sub>3</sub> O                                                                                                                  |
| <b>Formula weight</b>                      | 478.89 g/mol                                                                                                                                                          |
| <b>Temperature</b>                         | 173(2) K                                                                                                                                                              |
| <b>Wavelength</b>                          | 0.71073 Å                                                                                                                                                             |
| <b>Crystal size</b>                        | 0.149 x 0.153 x 0.196 mm                                                                                                                                              |
| <b>Crystal system</b>                      | monoclinic                                                                                                                                                            |
| <b>Space group</b>                         | P 1 21/n 1                                                                                                                                                            |
| <b>Unit cell dimensions</b>                | a = 14.5159(16) Å    α = 90°<br>b = 9.8890(11) Å    β = 91.637(4)°<br>c = 14.8049(16) Å    γ = 90°                                                                    |
| <b>Volume</b>                              | 2124.3(4) Å <sup>3</sup>                                                                                                                                              |
| <b>Z</b>                                   | 4                                                                                                                                                                     |
| <b>Density (calculated)</b>                | 1.497 g/cm <sup>3</sup>                                                                                                                                               |
| <b>Absorption coefficient</b>              | 2.924 mm <sup>-1</sup>                                                                                                                                                |
| <b>F(000)</b>                              | 976                                                                                                                                                                   |
| <b>Theta range for data collection</b>     | 2.75 to 30.59°                                                                                                                                                        |
| <b>Index ranges</b>                        | -20 ≤ h ≤ 20, -14 ≤ k ≤ 14, -21 ≤ l ≤ 20                                                                                                                              |
| <b>Reflections collected</b>               | 81002                                                                                                                                                                 |
| <b>Independent reflections</b>             | 6476 [R(int) = 0.0450]                                                                                                                                                |
| <b>Coverage of independent reflections</b> | 99.0%                                                                                                                                                                 |
| <b>Absorption correction</b>               | Numerical                                                                                                                                                             |
| <b>Max. and min. transmission</b>          | 0.6700 and 0.5980                                                                                                                                                     |
| <b>Structure solution technique</b>        | direct methods                                                                                                                                                        |
| <b>Structure solution program</b>          | SHELXT 2018/2 (Sheldrick, 2018)                                                                                                                                       |
| <b>Refinement method</b>                   | Full-matrix least-squares on F <sup>2</sup>                                                                                                                           |
| <b>Refinement program</b>                  | SHELXL-2018/3 (Sheldrick, 2018)                                                                                                                                       |
| <b>Function minimized</b>                  | Σ w(F <sub>o</sub> <sup>2</sup> - F <sub>c</sub> <sup>2</sup> ) <sup>2</sup>                                                                                          |
| <b>Data / restraints / parameters</b>      | 6476 / 0 / 250                                                                                                                                                        |
| <b>Goodness-of-fit on F<sup>2</sup></b>    | 1.031                                                                                                                                                                 |
| <b>Δ/σ<sub>max</sub></b>                   | 0.001                                                                                                                                                                 |
| <b>Final R indices</b>                     | 5126 data; I > 2σ(I)    R1 = 0.0313, wR2 = 0.0729<br>all data                    R1 = 0.0473, wR2 = 0.0798                                                            |
| <b>Weighting scheme</b>                    | w = 1/[σ <sup>2</sup> (F <sub>o</sub> <sup>2</sup> ) + (0.0370P) <sup>2</sup> + 1.3533P]<br>where P = (F <sub>o</sub> <sup>2</sup> + 2F <sub>c</sub> <sup>2</sup> )/3 |
| <b>Largest diff. peak and hole</b>         | 1.070 and -0.535 eÅ <sup>-3</sup>                                                                                                                                     |
| <b>R.M.S. deviation from mean</b>          | 0.079 eÅ <sup>-3</sup>                                                                                                                                                |

**Table S6. Sample and crystal data for 7.N<sub>3</sub>**

|                                            |                                                                                                                                                               |
|--------------------------------------------|---------------------------------------------------------------------------------------------------------------------------------------------------------------|
| <b>Chemical formula</b>                    | C <sub>44</sub> H <sub>54</sub> Cl <sub>4</sub> Cu <sub>2</sub> N <sub>12</sub> O <sub>2</sub>                                                                |
| <b>Formula weight</b>                      | 1051.87 g/mol                                                                                                                                                 |
| <b>Temperature</b>                         | 173(2) K                                                                                                                                                      |
| <b>Wavelength</b>                          | 0.71073 Å                                                                                                                                                     |
| <b>Crystal size</b>                        | 0.122 x 0.131 x 0.228 mm                                                                                                                                      |
| <b>Crystal system</b>                      | triclinic                                                                                                                                                     |
| <b>Space group</b>                         | P -1                                                                                                                                                          |
| <b>Unit cell dimensions</b>                | a = 10.2745(7) Å    α = 91.902(4)°<br>b = 11.2131(7) Å    β = 93.379(4)°<br>c = 11.3294(8) Å    γ = 113.401(3)°                                               |
| <b>Volume</b>                              | 1193.52(14) Å <sup>3</sup>                                                                                                                                    |
| <b>Z</b>                                   | 1                                                                                                                                                             |
| <b>Density (calculated)</b>                | 1.463 g/cm <sup>3</sup>                                                                                                                                       |
| <b>Absorption coefficient</b>              | 1.166 mm <sup>-1</sup>                                                                                                                                        |
| <b>F(000)</b>                              | 544                                                                                                                                                           |
| <b>Theta range for data collection</b>     | 2.60 to 30.62°                                                                                                                                                |
| <b>Index ranges</b>                        | -14<=h<=14, -15<=k<=16, -16<=l<=16                                                                                                                            |
| <b>Reflections collected</b>               | 92223                                                                                                                                                         |
| <b>Independent reflections</b>             | 7307 [R(int) = 0.0675]                                                                                                                                        |
| <b>Coverage of independent reflections</b> | 98.9%                                                                                                                                                         |
| <b>Absorption correction</b>               | Numerical                                                                                                                                                     |
| <b>Max. and min. transmission</b>          | 0.8710 and 0.7770                                                                                                                                             |
| <b>Structure solution technique</b>        | direct methods                                                                                                                                                |
| <b>Structure solution program</b>          | SHELXT 2018/2 (Sheldrick, 2018)                                                                                                                               |
| <b>Refinement method</b>                   | Full-matrix least-squares on F <sup>2</sup>                                                                                                                   |
| <b>Refinement program</b>                  | SHELXL-2018/3 (Sheldrick, 2018)                                                                                                                               |
| <b>Function minimized</b>                  | Σ w(F <sub>o</sub> <sup>2</sup> - F <sub>c</sub> <sup>2</sup> ) <sup>2</sup>                                                                                  |
| <b>Data / restraints / parameters</b>      | 7307 / 0 / 315                                                                                                                                                |
| <b>Goodness-of-fit on F<sup>2</sup></b>    | 1.021                                                                                                                                                         |
| <b>Final R indices</b>                     | 4788 data; I>2σ(I)    R1 = 0.0616, wR2 = 0.1604<br>all data                    R1 = 0.1037, wR2 = 0.1885                                                      |
| <b>Weighting scheme</b>                    | w=1/[σ <sup>2</sup> (F <sub>o</sub> <sup>2</sup> )+(0.0913P) <sup>2</sup> +1.6021P]<br>where P=(F <sub>o</sub> <sup>2</sup> +2F <sub>c</sub> <sup>2</sup> )/3 |
| <b>Largest diff. peak and hole</b>         | 2.054 and -1.243 eÅ <sup>-3</sup>                                                                                                                             |
| <b>R.M.S. deviation from mean</b>          | 0.094 eÅ <sup>-3</sup>                                                                                                                                        |

**Table S7. Sample and crystal refinement data for 7.NCS**

|                                            |                                                                                                                                                                       |
|--------------------------------------------|-----------------------------------------------------------------------------------------------------------------------------------------------------------------------|
| <b>Chemical formula</b>                    | C <sub>22</sub> H <sub>25</sub> CuN <sub>4</sub> OS                                                                                                                   |
| <b>Formula weight</b>                      | 457.06 g/mol                                                                                                                                                          |
| <b>Temperature</b>                         | 173(2) K                                                                                                                                                              |
| <b>Wavelength</b>                          | 0.71073 Å                                                                                                                                                             |
| <b>Crystal size</b>                        | 0.100 x 0.217 x 0.999 mm                                                                                                                                              |
| <b>Crystal system</b>                      | monoclinic                                                                                                                                                            |
| <b>Space group</b>                         | P 1 21/n 1                                                                                                                                                            |
| <b>Unit cell dimensions</b>                | a = 11.7265(16) Å    α = 90°<br>b = 10.3870(14) Å    β = 105.032(4)°<br>c = 18.401(2) Å      γ = 90°                                                                  |
| <b>Volume</b>                              | 2164.6(5) Å <sup>3</sup>                                                                                                                                              |
| <b>Z</b>                                   | 4                                                                                                                                                                     |
| <b>Density (calculated)</b>                | 1.402 g/cm <sup>3</sup>                                                                                                                                               |
| <b>Absorption coefficient</b>              | 1.126 mm <sup>-1</sup>                                                                                                                                                |
| <b>F(000)</b>                              | 952                                                                                                                                                                   |
| <b>Theta range for data collection</b>     | 2.29 to 27.48°                                                                                                                                                        |
| <b>Index ranges</b>                        | -15 ≤ h ≤ 15, -13 ≤ k ≤ 13, -23 ≤ l ≤ 23                                                                                                                              |
| <b>Reflections collected</b>               | 74975                                                                                                                                                                 |
| <b>Independent reflections</b>             | 4966 [R(int) = 0.0447]                                                                                                                                                |
| <b>Coverage of independent reflections</b> | 99.9%                                                                                                                                                                 |
| <b>Absorption correction</b>               | Numerical                                                                                                                                                             |
| <b>Max. and min. transmission</b>          | 0.8960 and 0.3990                                                                                                                                                     |
| <b>Structure solution technique</b>        | direct methods                                                                                                                                                        |
| <b>Structure solution program</b>          | SHELXT 2018/2 (Sheldrick, 2018)                                                                                                                                       |
| <b>Refinement method</b>                   | Full-matrix least-squares on F <sup>2</sup>                                                                                                                           |
| <b>Refinement program</b>                  | SHELXL-2018/3 (Sheldrick, 2018)                                                                                                                                       |
| <b>Function minimized</b>                  | Σ w(F <sub>o</sub> <sup>2</sup> - F <sub>c</sub> <sup>2</sup> ) <sup>2</sup>                                                                                          |
| <b>Data / restraints / parameters</b>      | 4966 / 0 / 335                                                                                                                                                        |
| <b>Goodness-of-fit on F<sup>2</sup></b>    | 1.048                                                                                                                                                                 |
| <b>Δ/σ<sub>max</sub></b>                   | 0.002                                                                                                                                                                 |
| <b>Final R indices</b>                     | 4169 data; I > 2σ(I)    R1 = 0.0298, wR2 = 0.0775<br>all data                    R1 = 0.0397, wR2 = 0.0831                                                            |
| <b>Weighting scheme</b>                    | w = 1/[σ <sup>2</sup> (F <sub>o</sub> <sup>2</sup> ) + (0.0401P) <sup>2</sup> + 1.2771P]<br>where P = (F <sub>o</sub> <sup>2</sup> + 2F <sub>c</sub> <sup>2</sup> )/3 |
| <b>Largest diff. peak and hole</b>         | 0.297 and -0.298 eÅ <sup>-3</sup>                                                                                                                                     |
| <b>R.M.S. deviation from mean</b>          | 0.055 eÅ <sup>-3</sup>                                                                                                                                                |



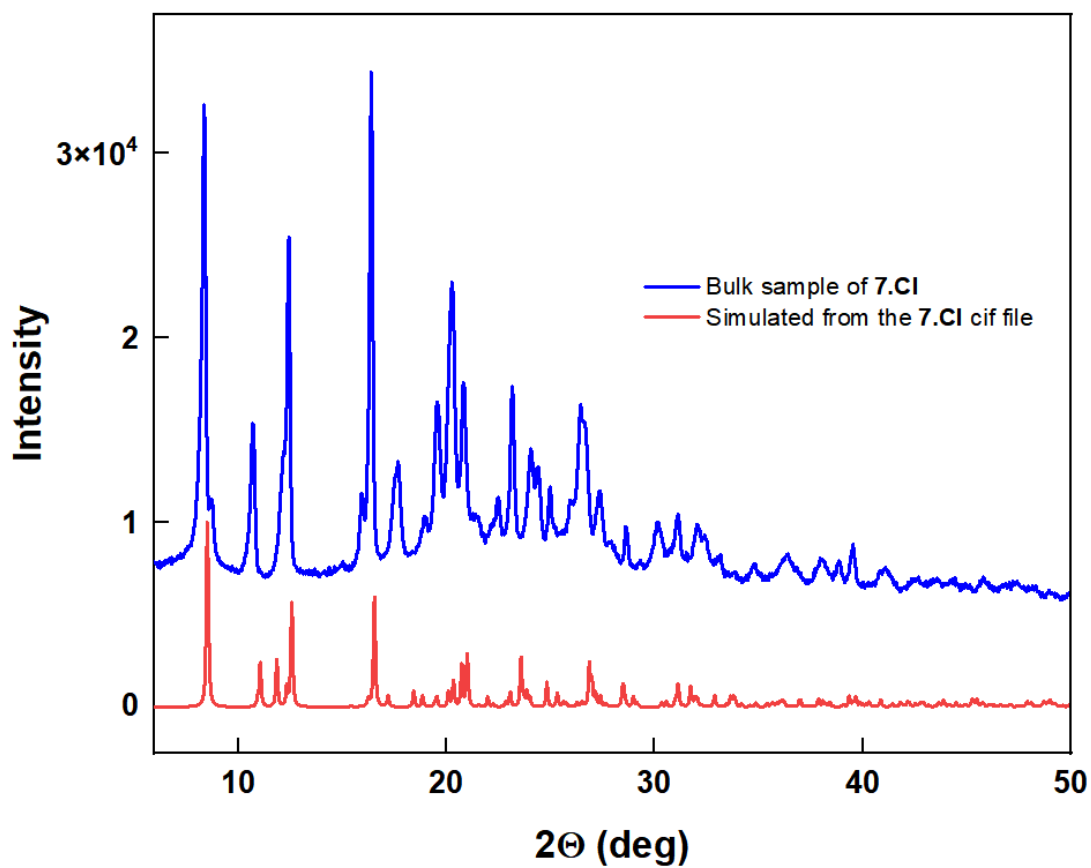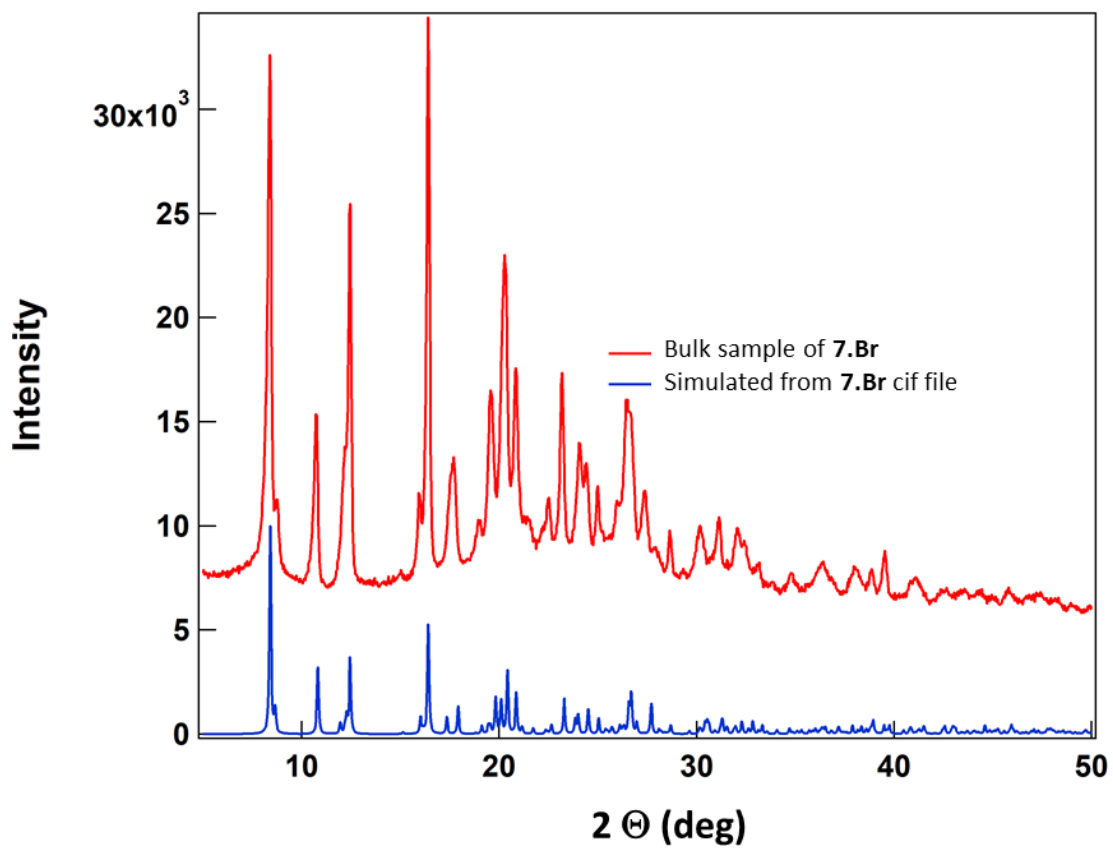

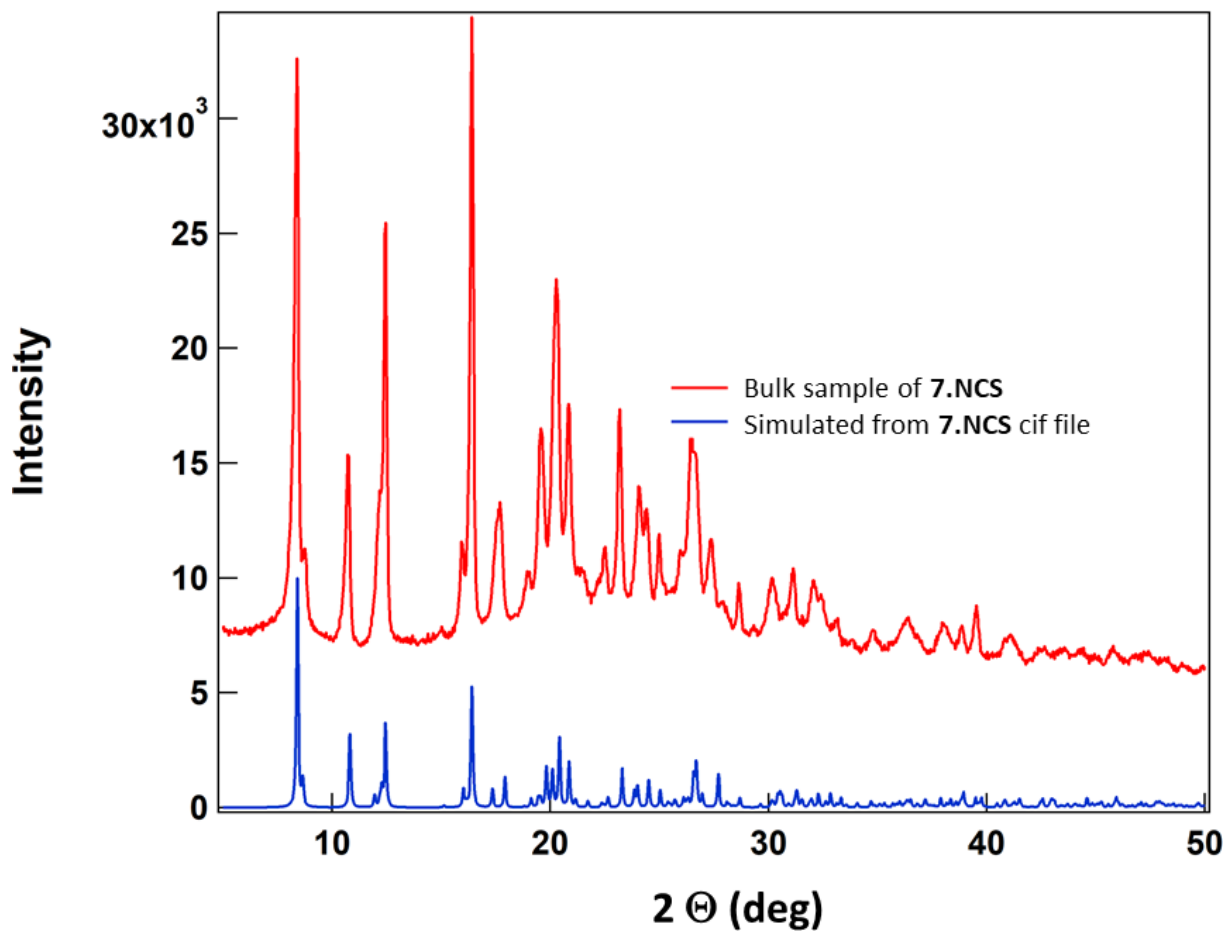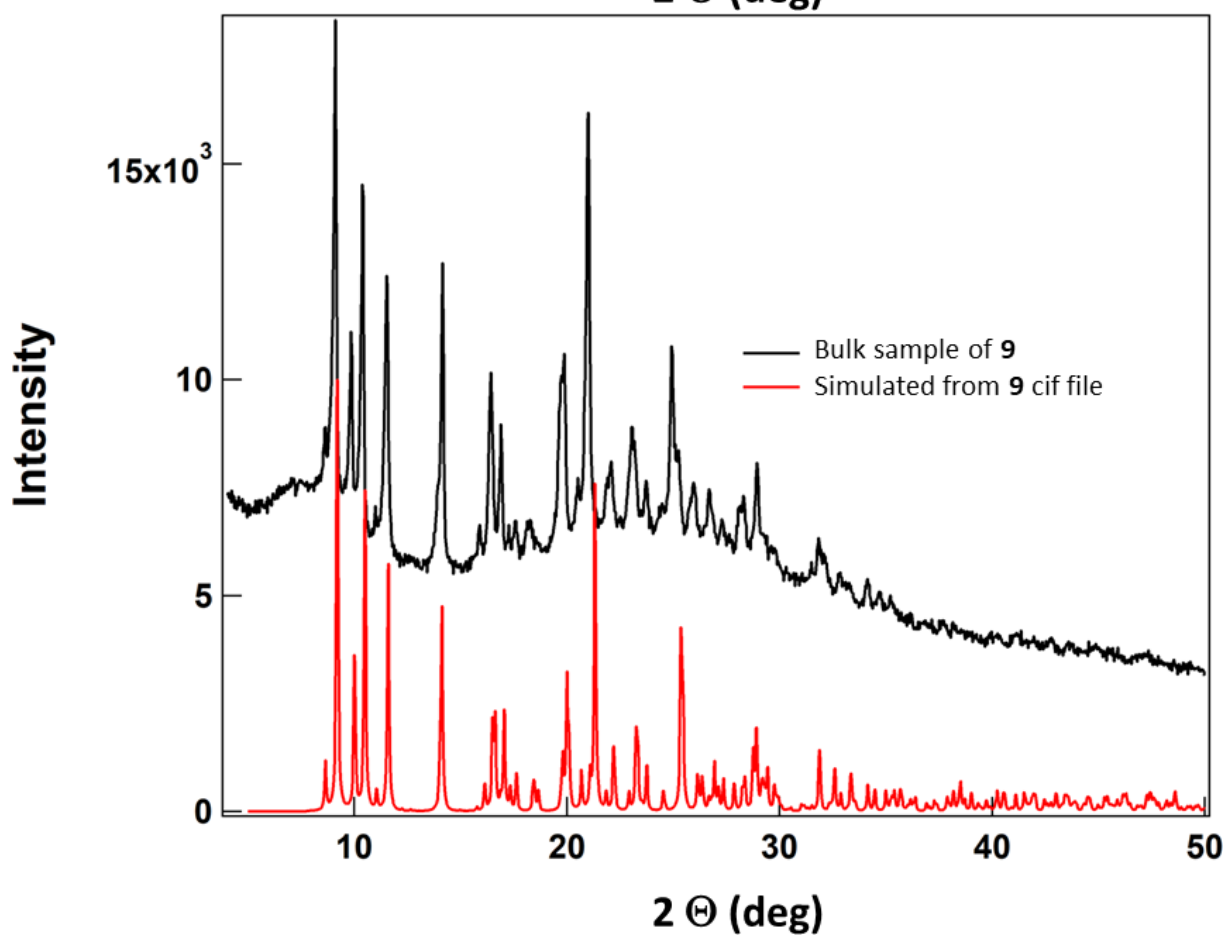

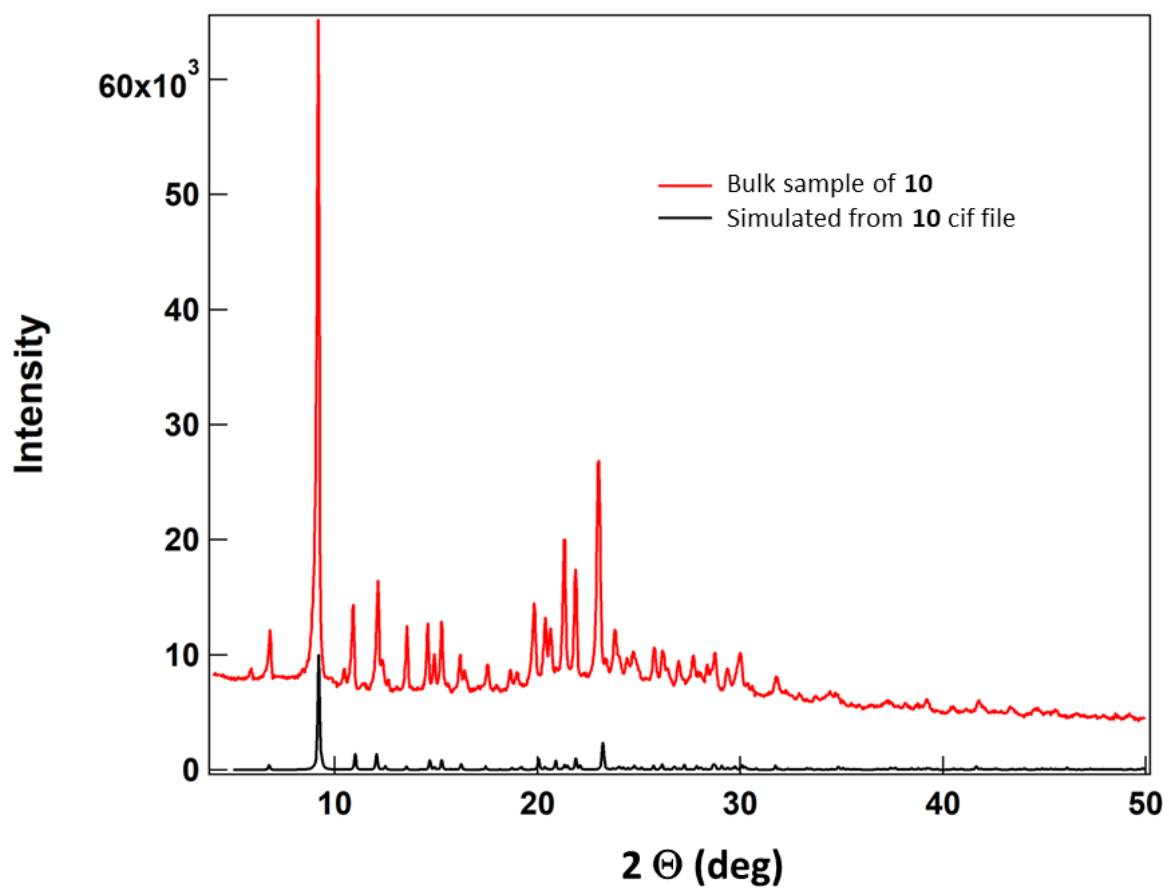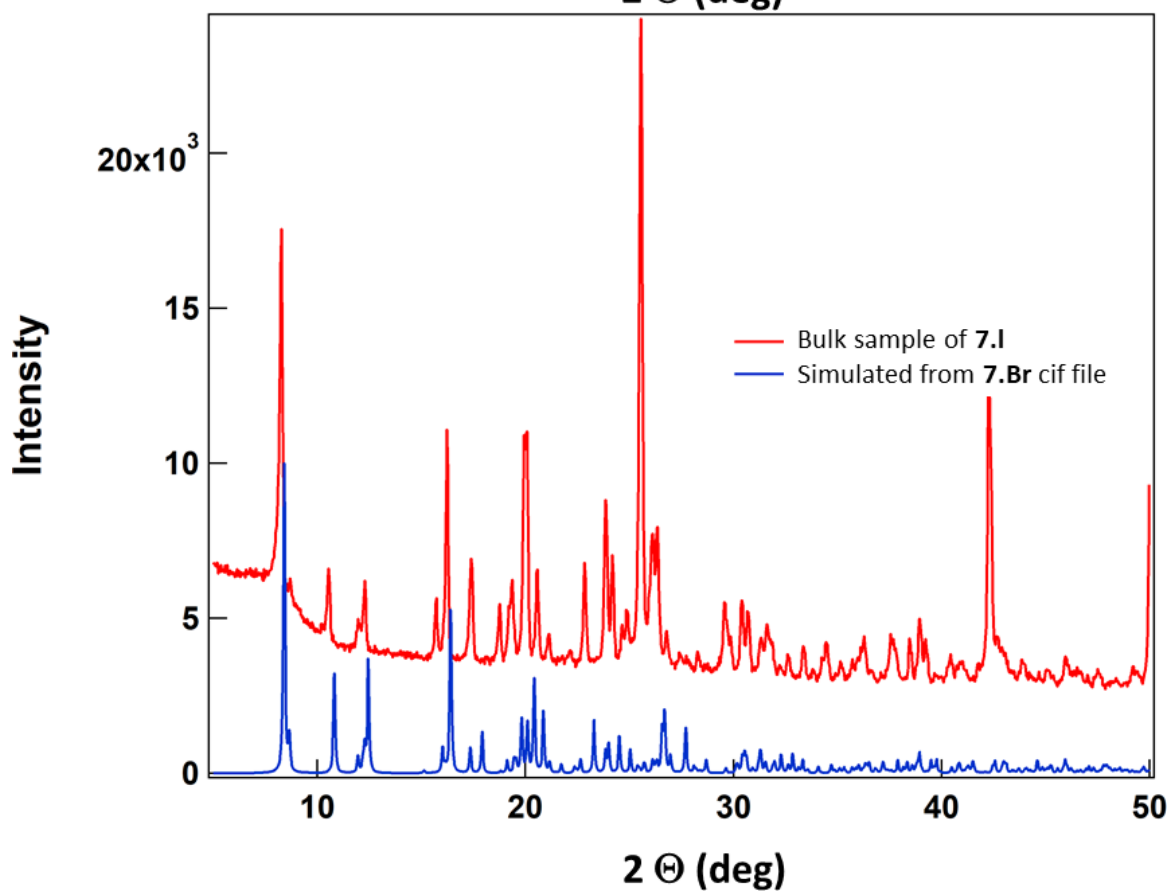

Figure S2: Simulated and experimental PXRD data

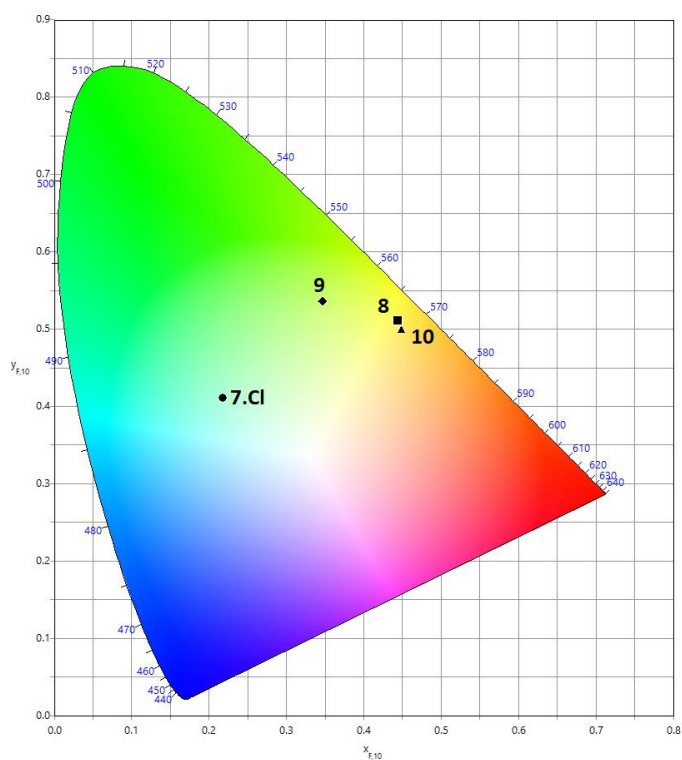

**Fig. S3** CIE diagram for the variation N<sup>C</sup> ligand (halide = Cl<sup>-</sup>).

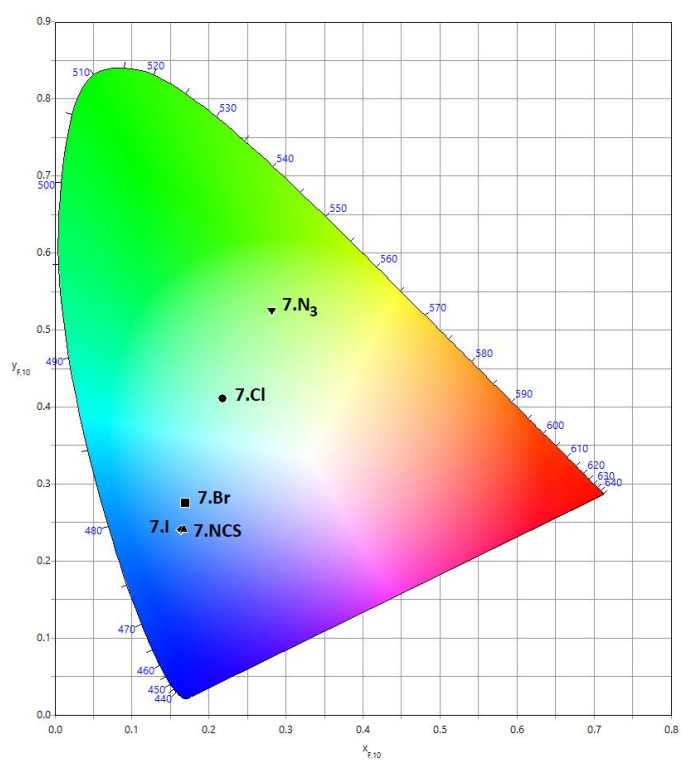

**Fig. S4** CIE2015 diagram for the variation of halide/pseudohalide in the 7.X series

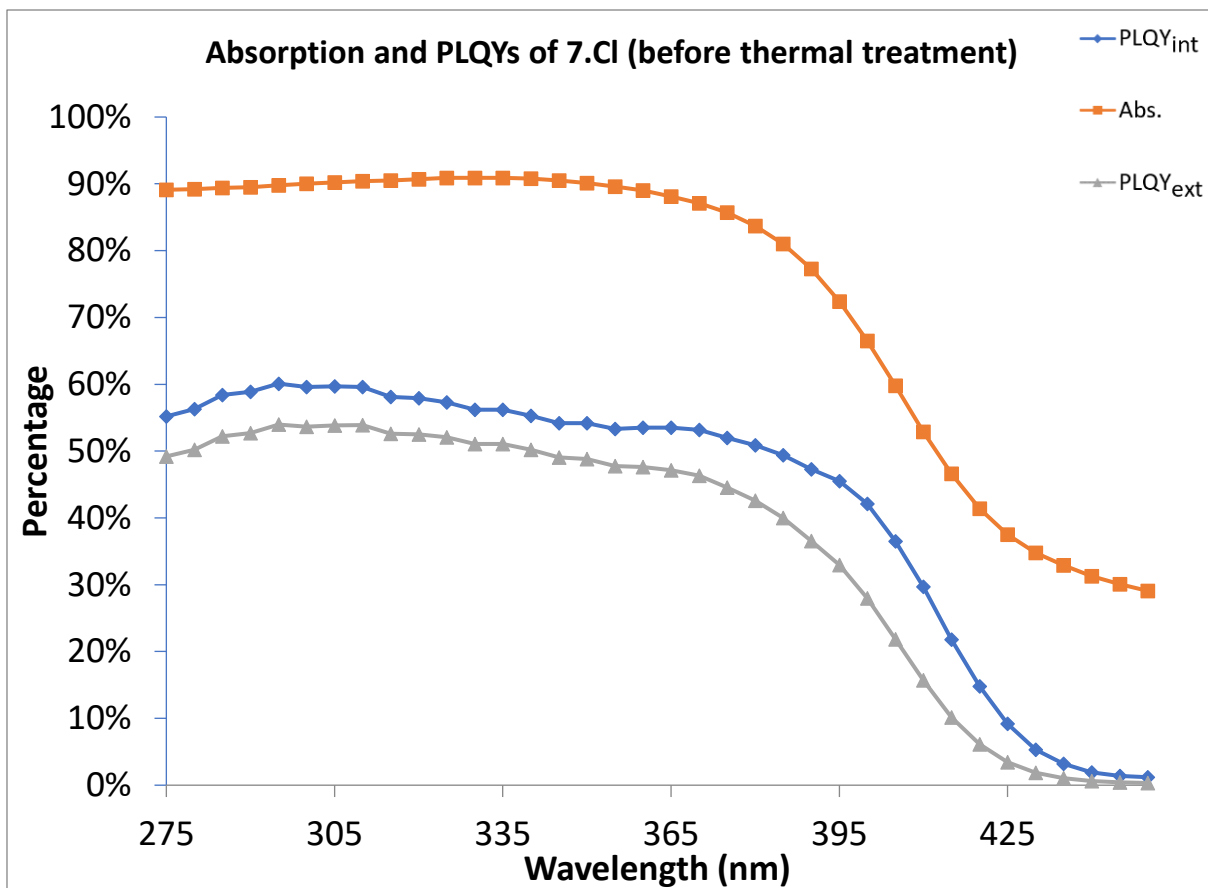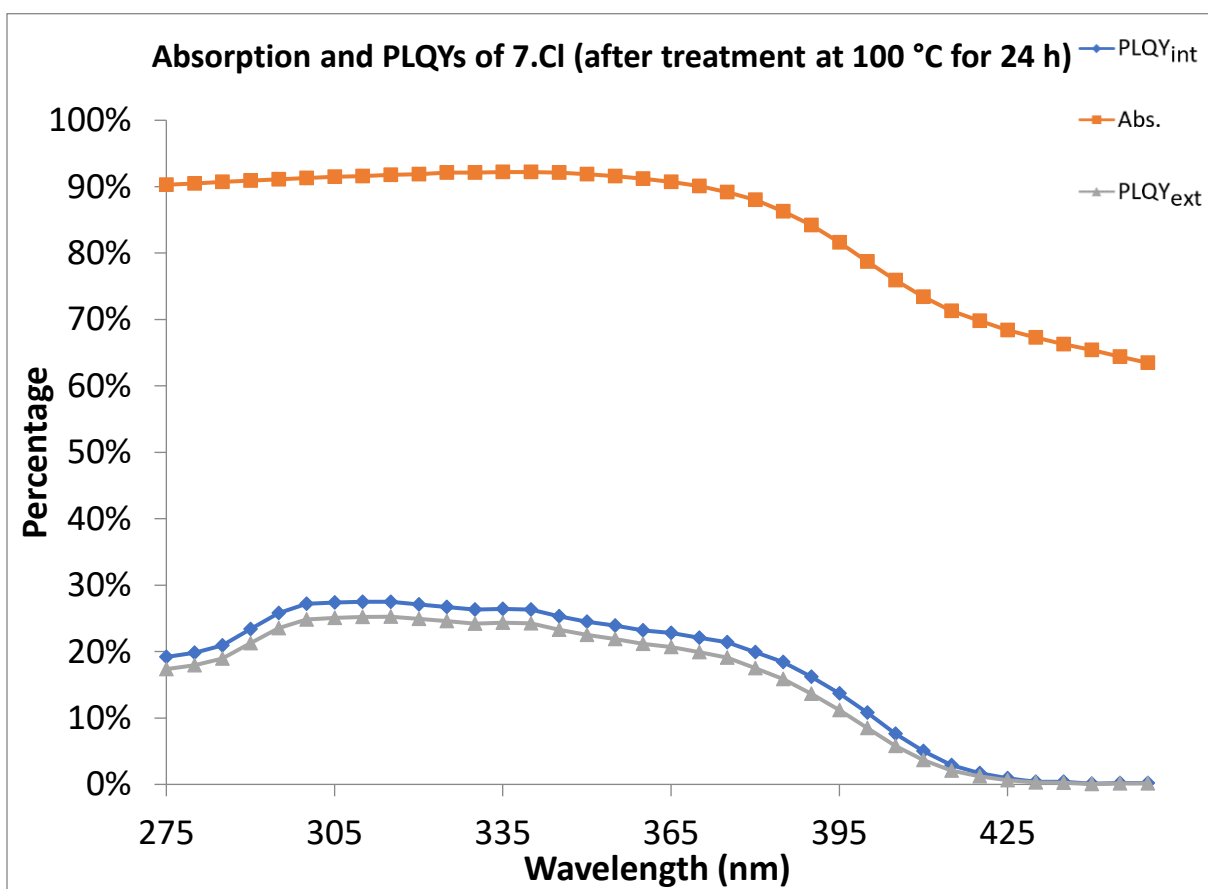

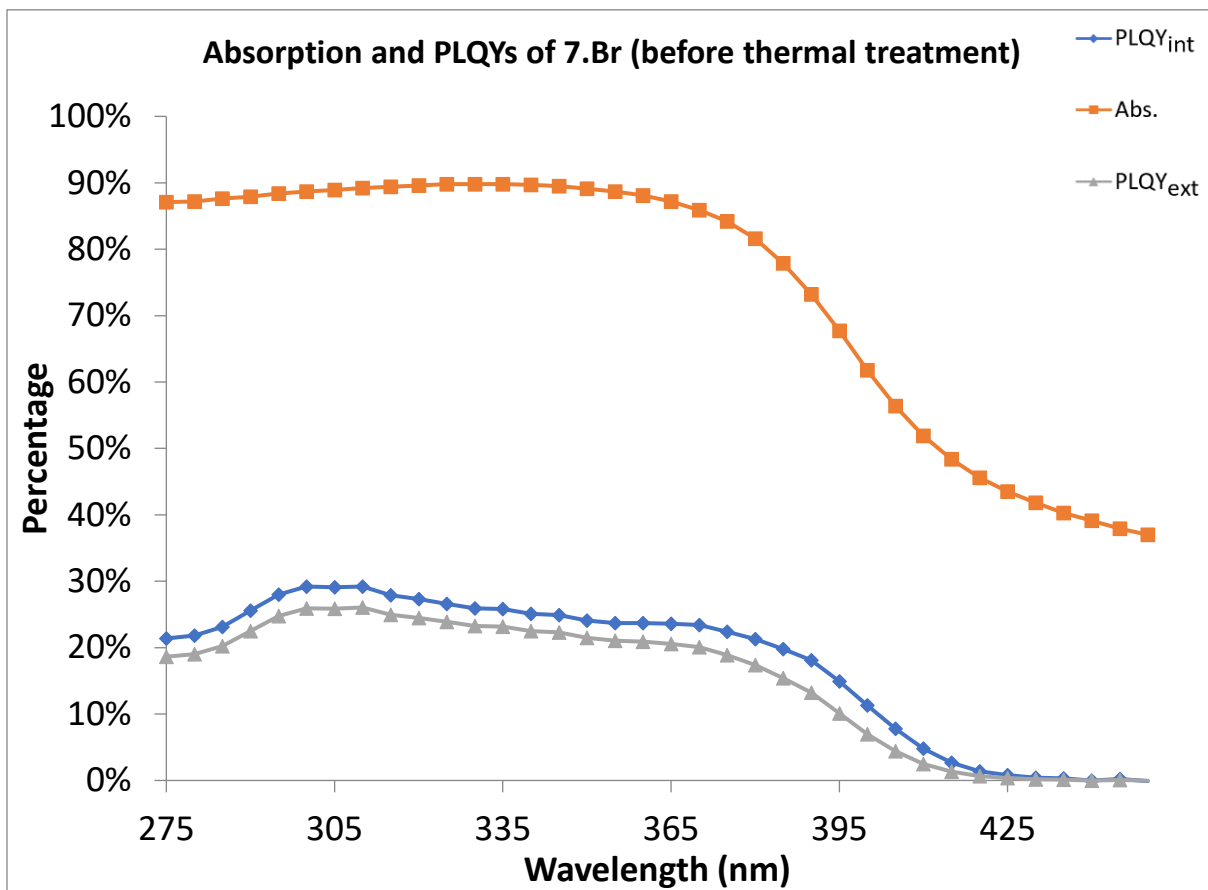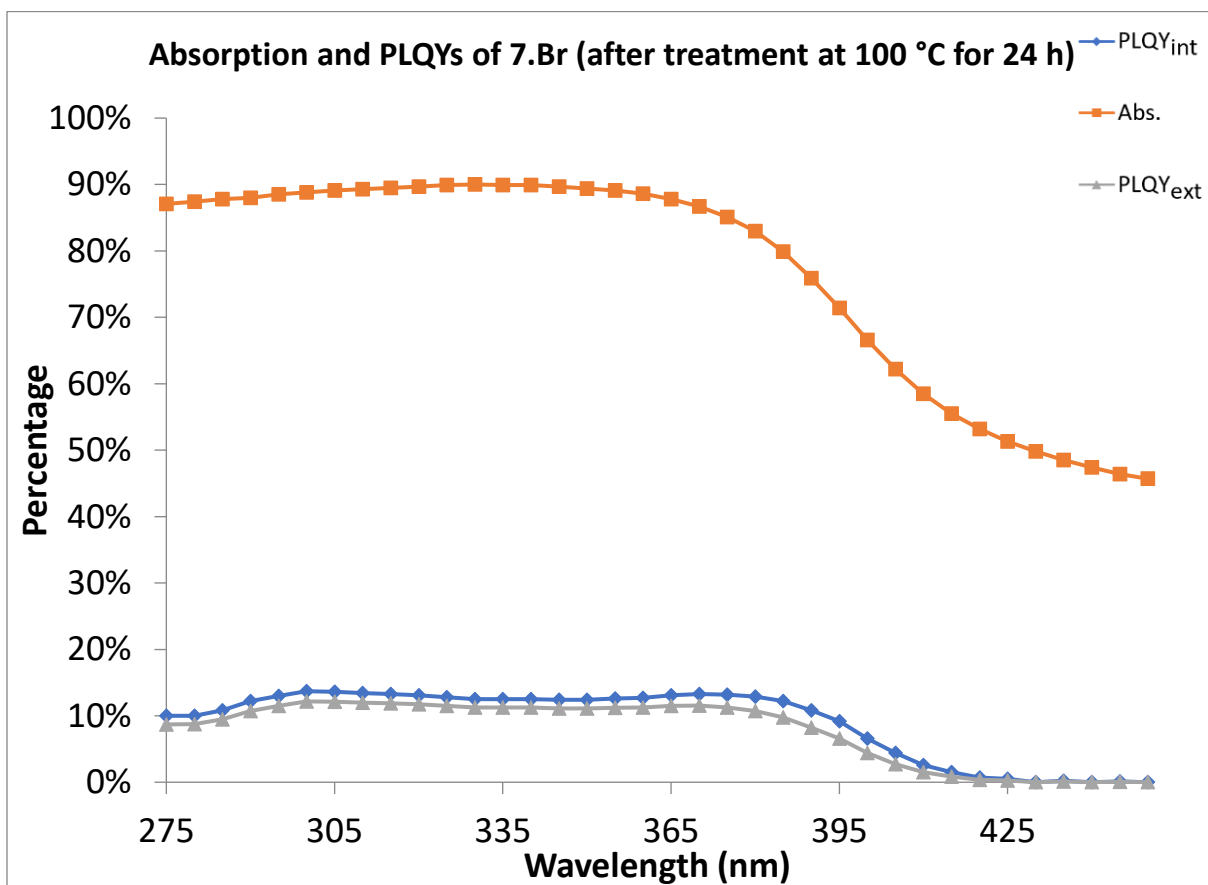

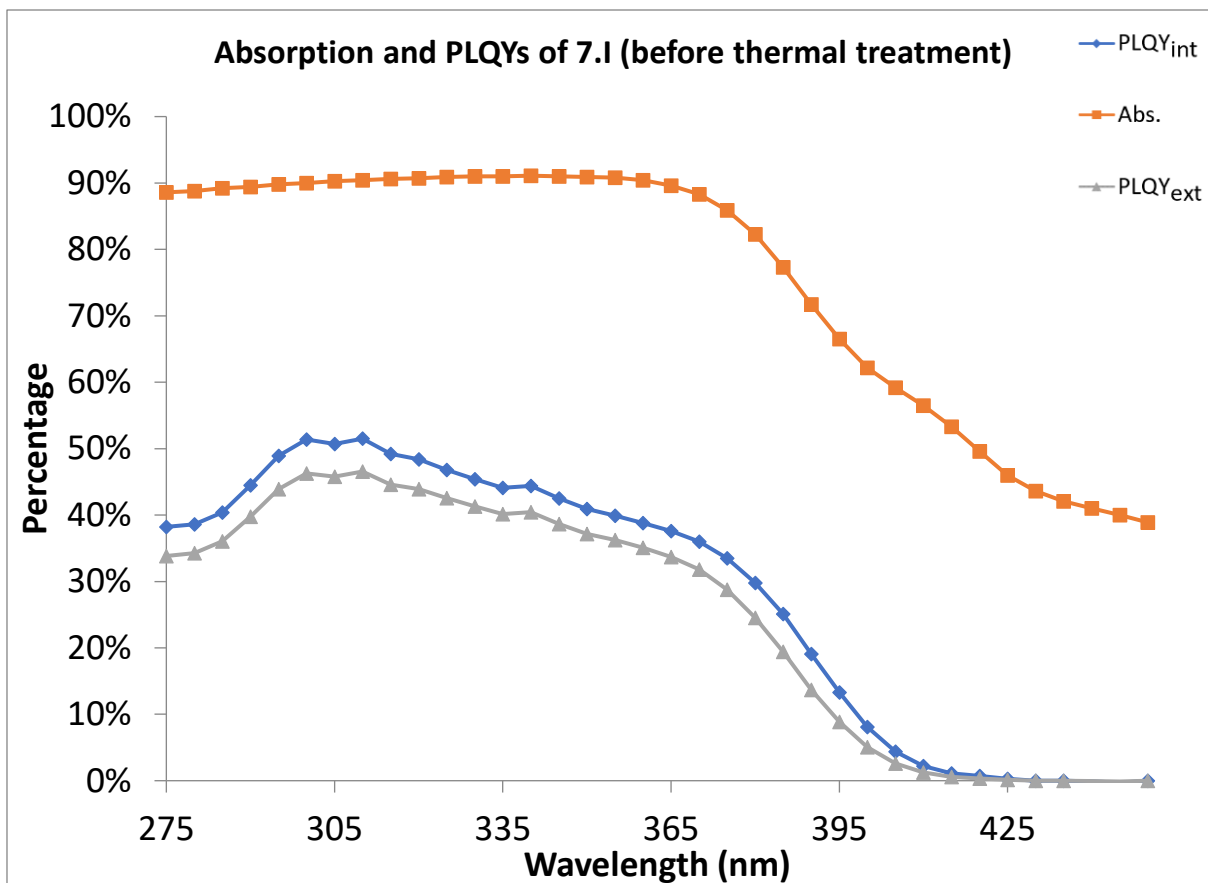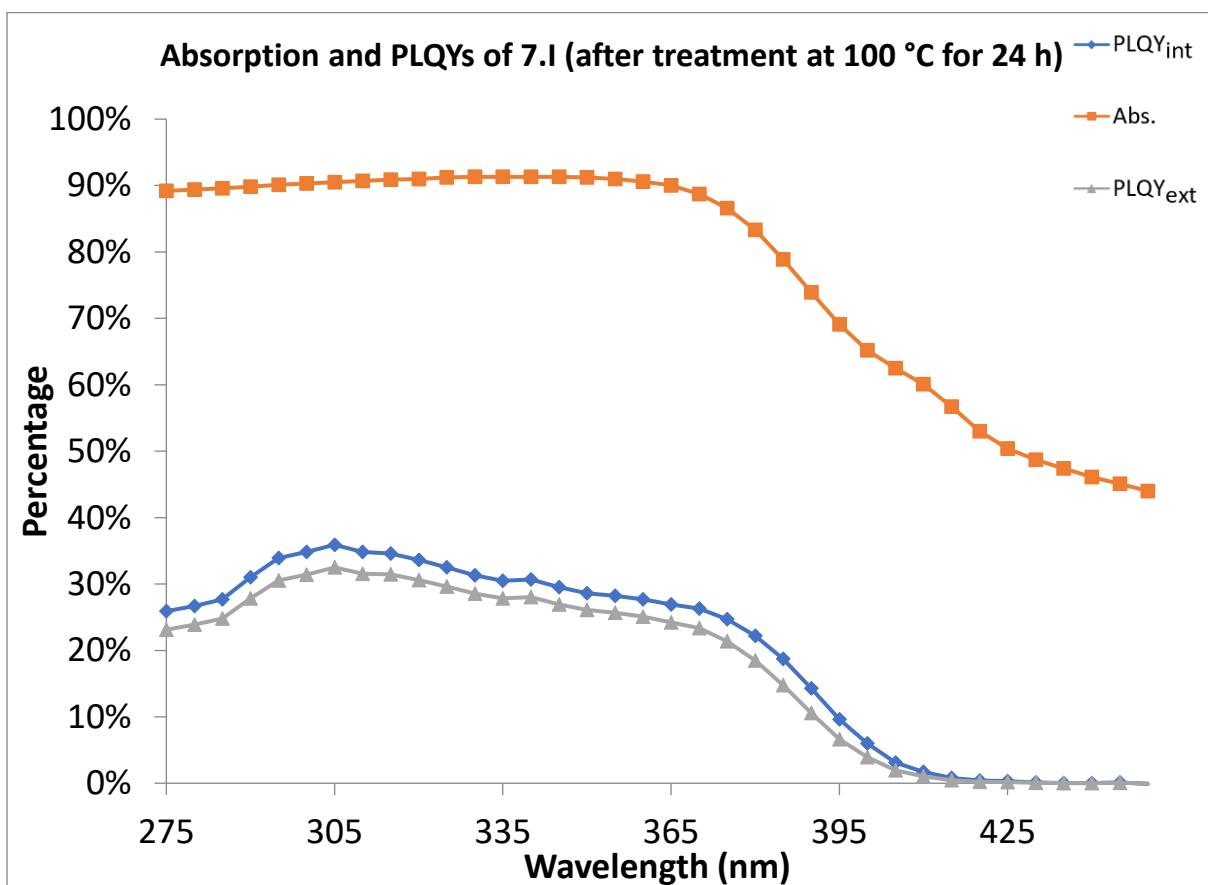

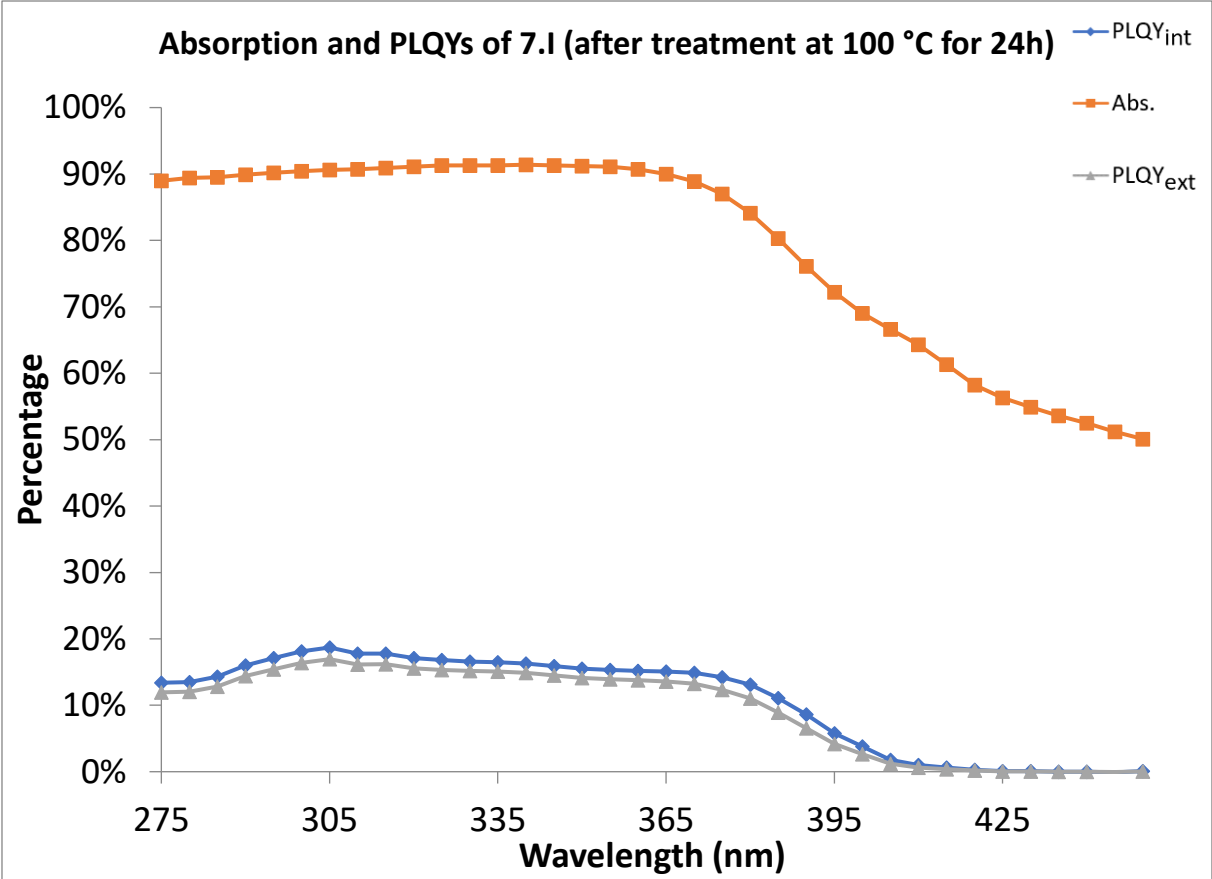



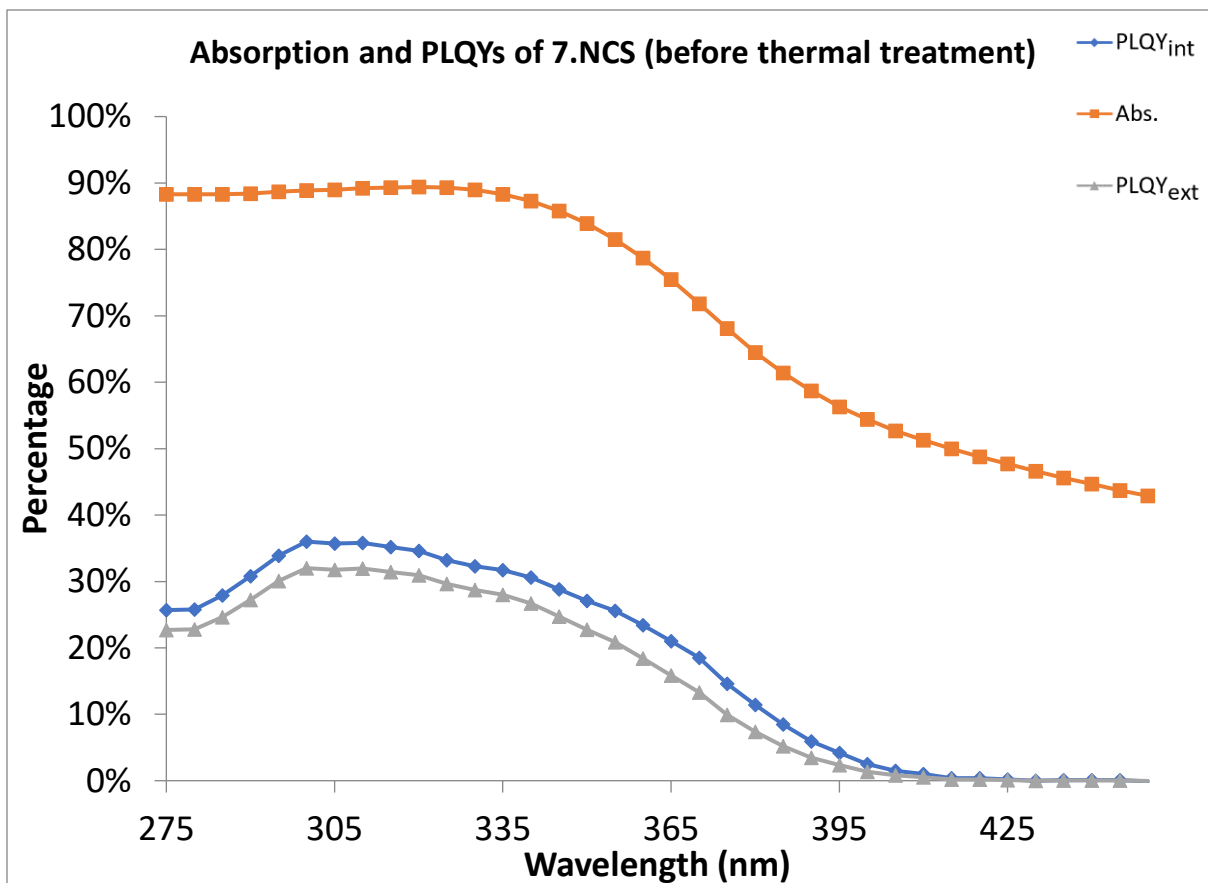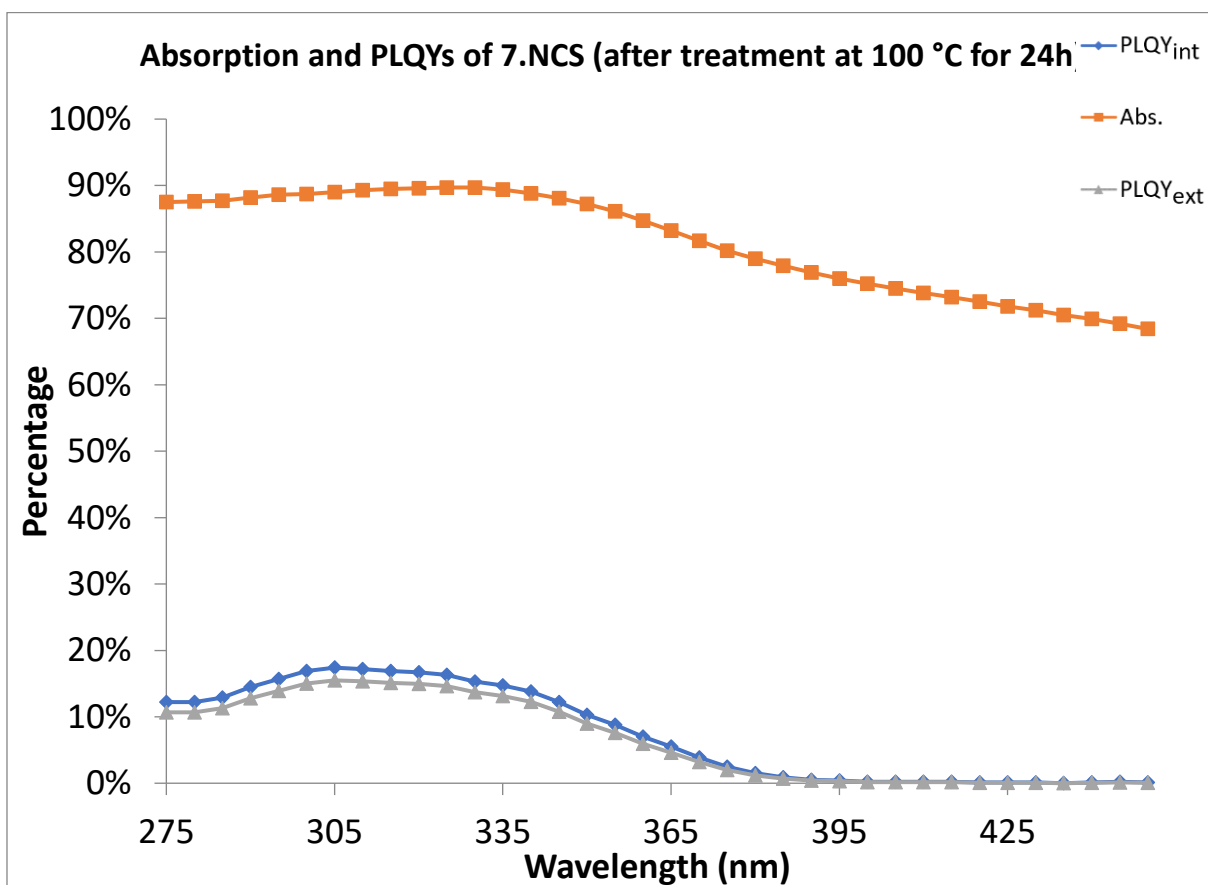

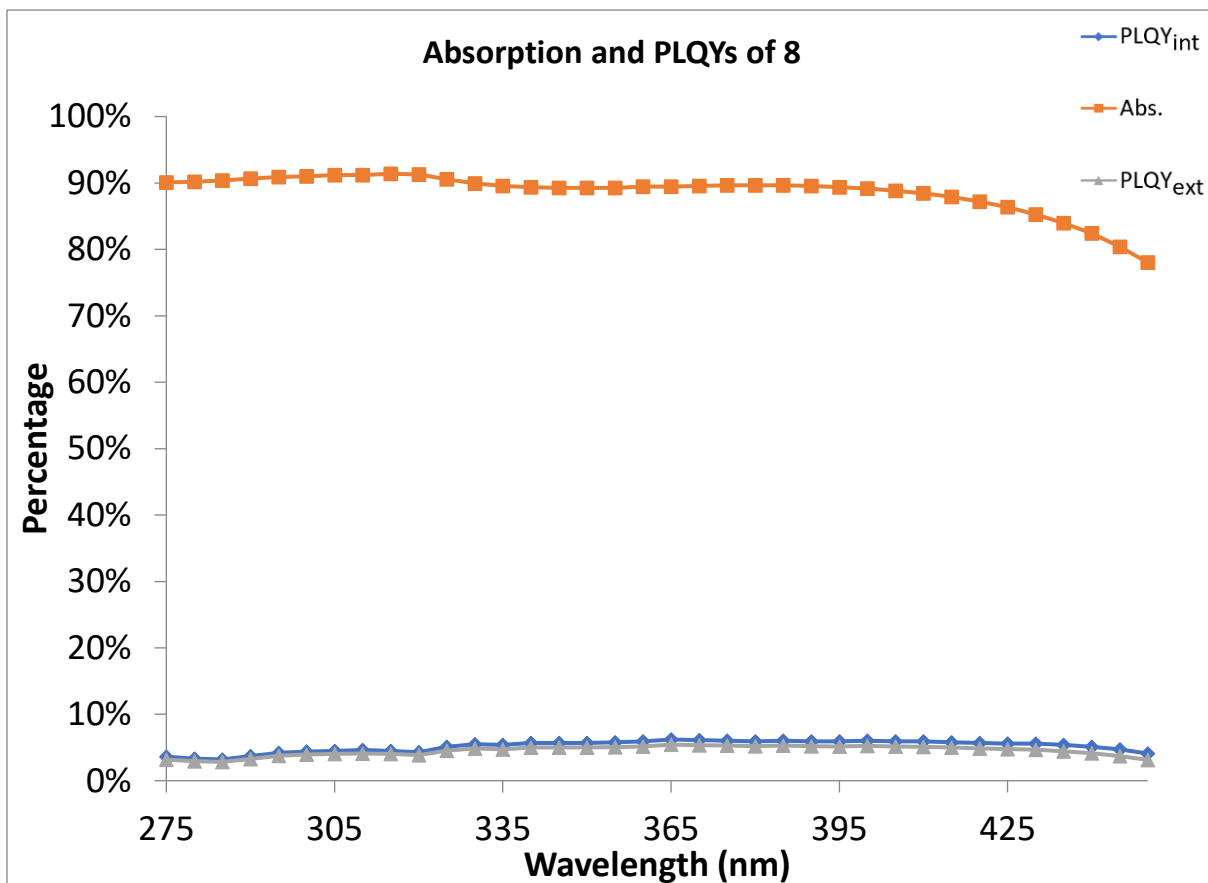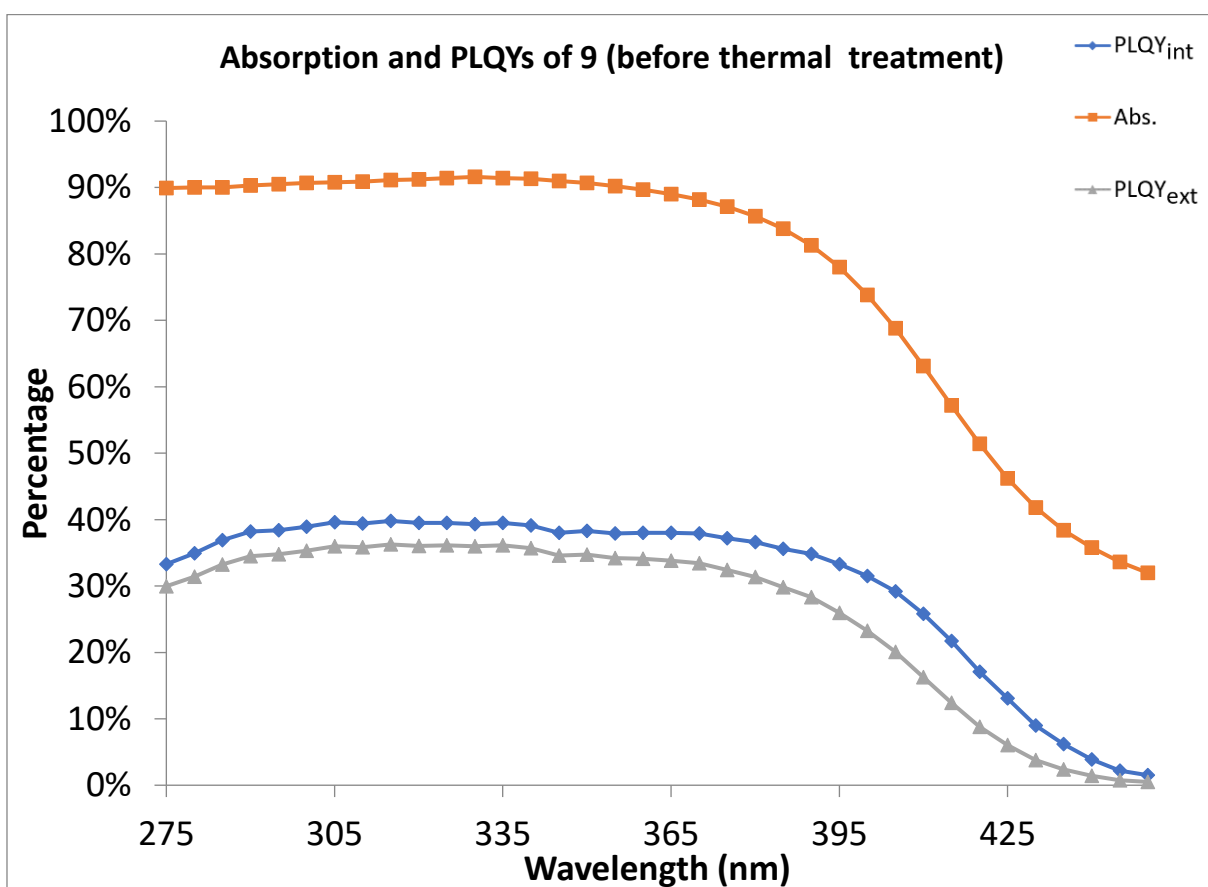

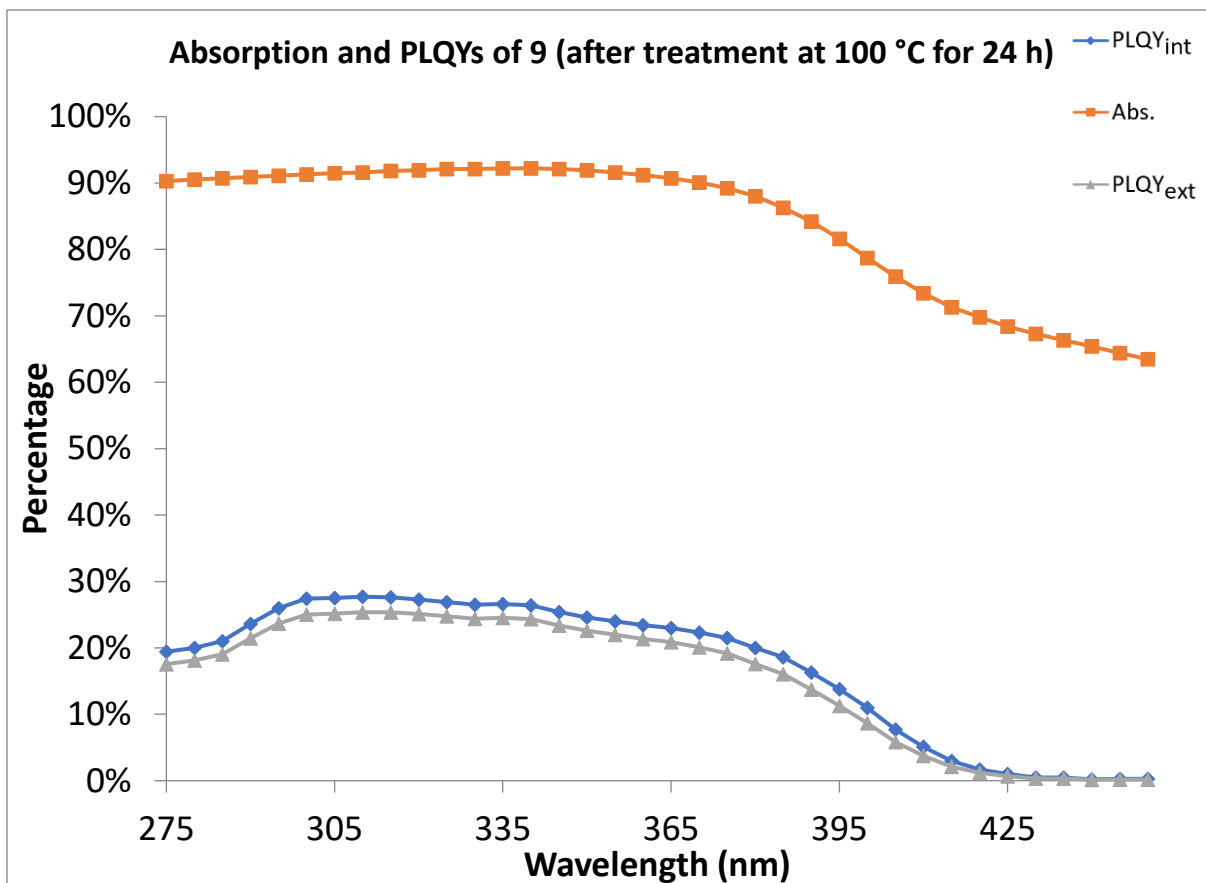

**Fig. S5** Variation of PL QY<sub>ext</sub> PL QY<sub>int</sub> and Abs. as a function of the excitation wavelength at room temperature for complexes 7.X (X = Cl, Br, NCS and I), 8, 9; after thermal treatment at 100 °C during 24 h (or 120 h) where relevant.

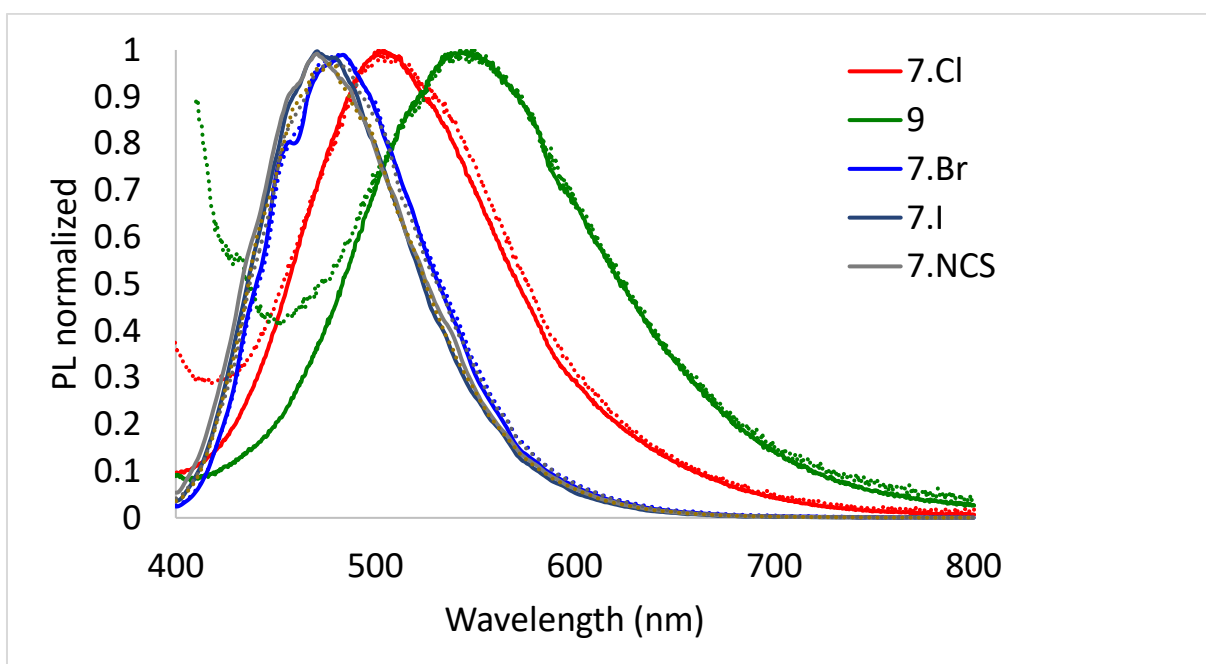

**Fig. S6** Comparison of 7.Cl, 9, 7.Br, 7.NCS before and after thermal treatment (100°C, 24h). Emission spectra recorded with 331, 336, 330 and 331 as respective  $\lambda_{exc}$  values.

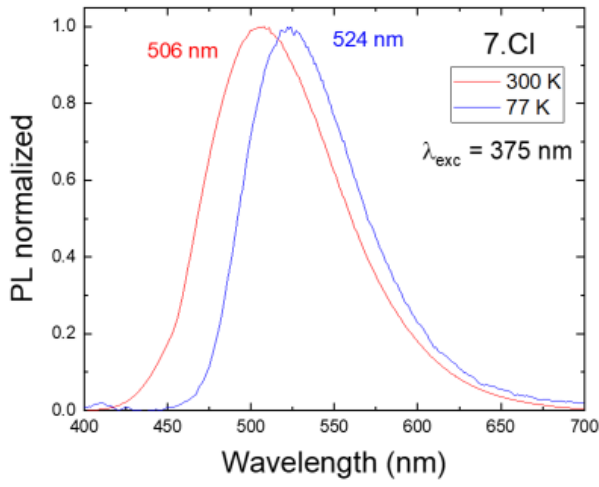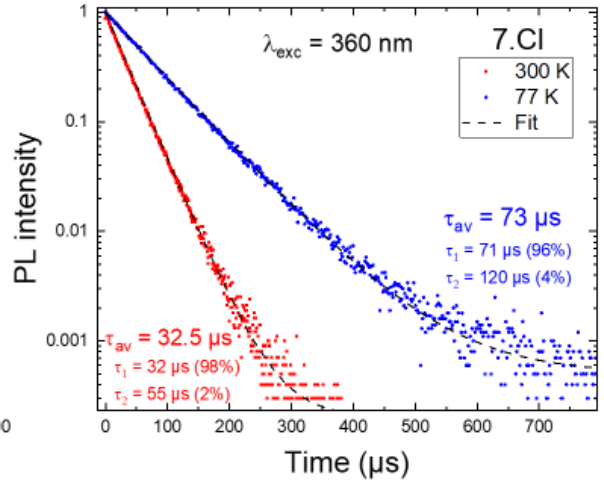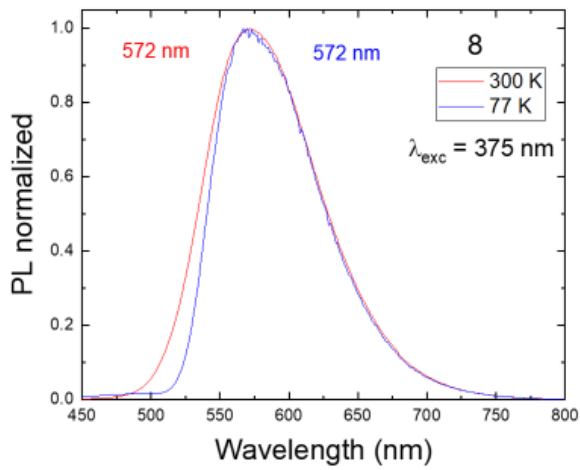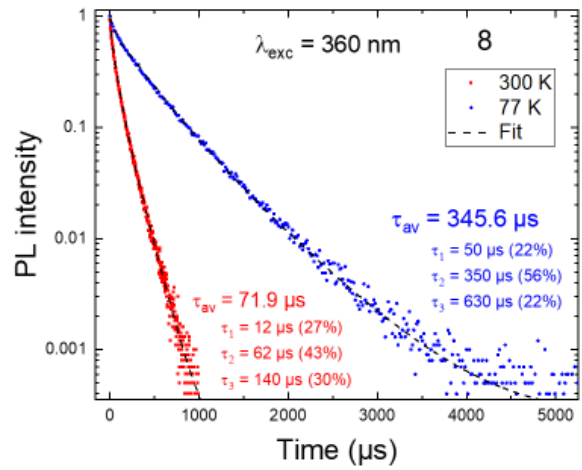

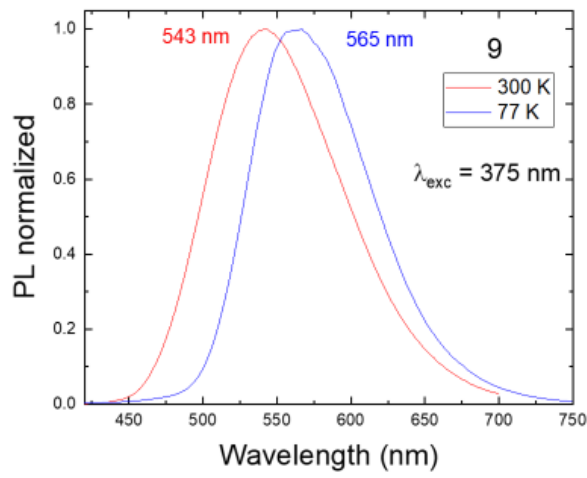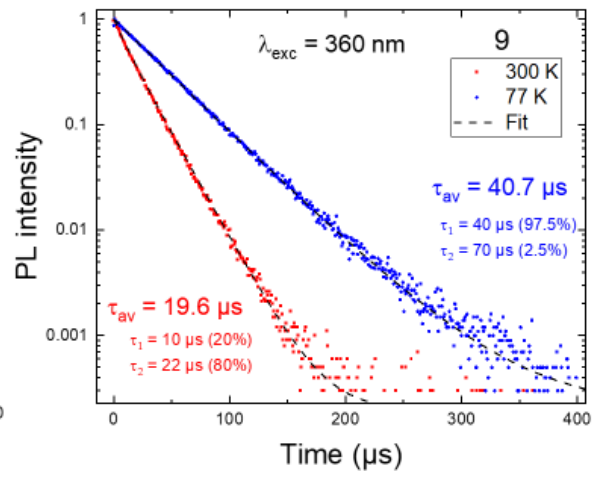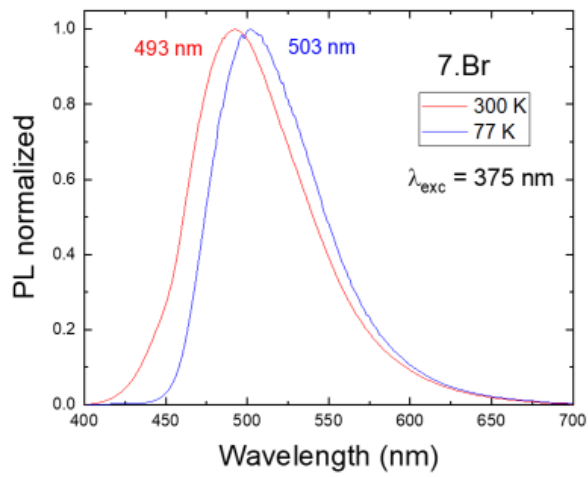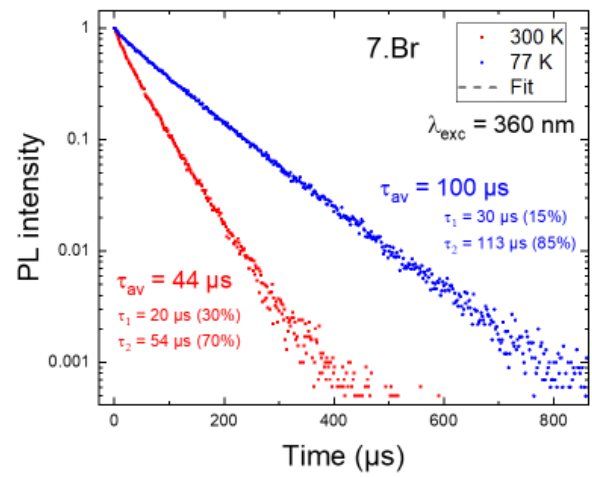

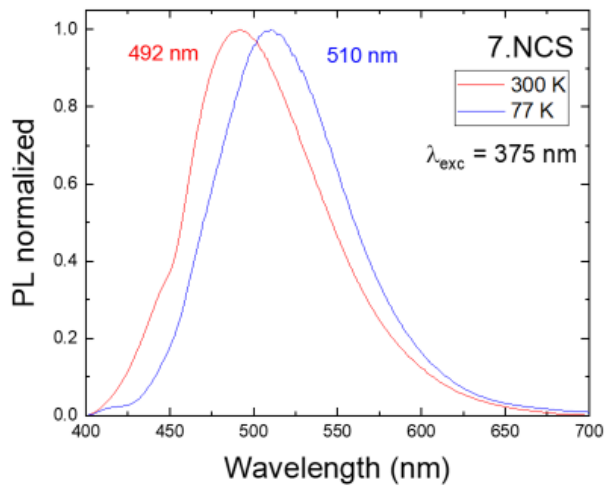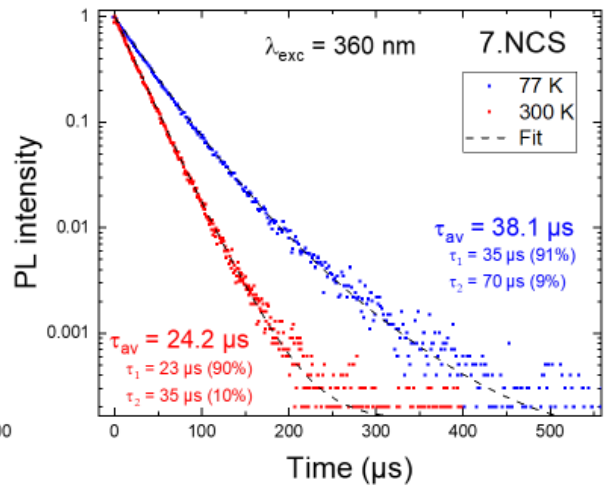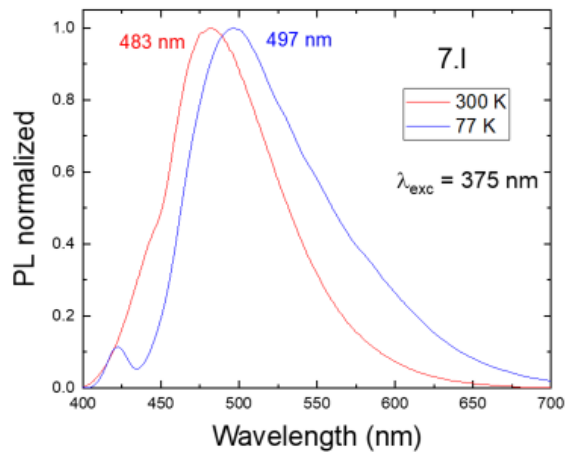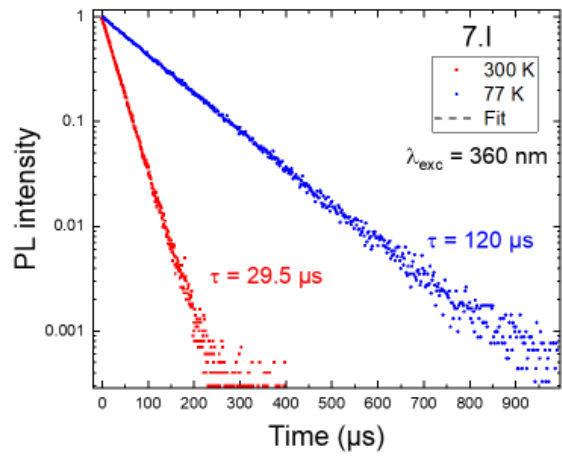

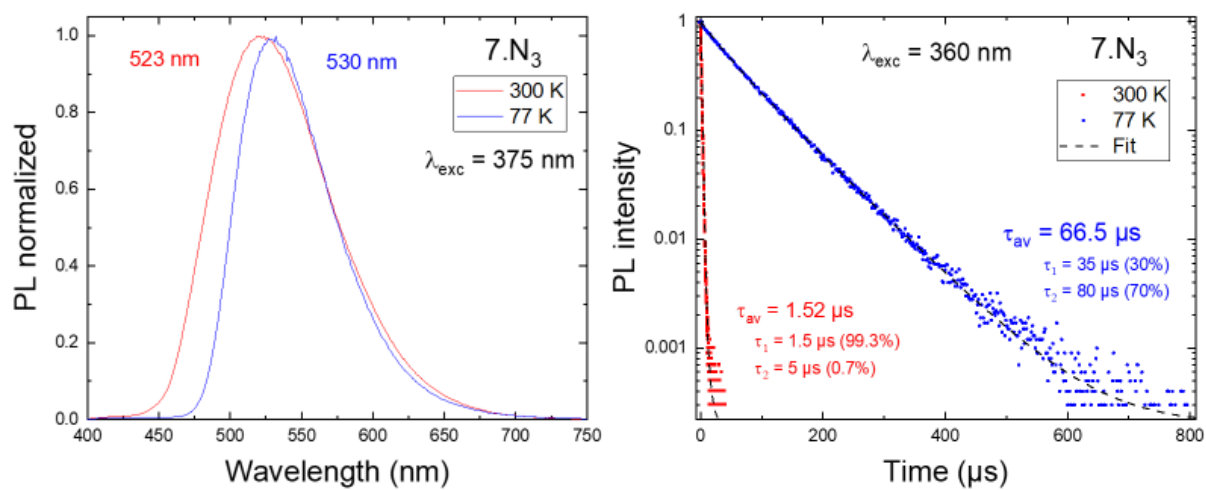

**Fig. S7** left) emission spectra at room temperature and 77K ( $\lambda_{\text{exc}} = 375$  nm); right) luminescence decay profiles at room temperature and 77 K ( $\lambda_{\text{exc}} = 360$  nm,  $\lambda_{\text{em}}$  detailed in Table 3), of the powders **7.X** (X = Cl, Br, NCS, I, N<sub>3</sub>), **8** and **9**.
